# Supplementary material
Source: publisher site journal article supplement (https://www.dovepress.com/get_supplementary_file.php?f=193808-TS5.xlsx)
Supplement: Supplementary file 1 [file get_supplementary_file.php]

## Sheet: TableS5
TableS5: GO terms on BP, CC, MF levels enriched of the DEGs between S1 and S3
GO_type	GO_term	Num_Genes	p_adjust	p_value
CC	immunoglobulin complex	34	2.95883e-45	1.12077e-47
CC	immunoglobulin complex, circulating	33	5.65434e-45	4.28359e-47
CC	blood microparticle	47	3.75488e-38	4.26691e-40
CC	extracellular matrix	49	4.05987e-20	6.15131e-22
CC	proteinaceous extracellular matrix	42	1.16011e-18	2.19718e-20
CC	external side of plasma membrane	37	1.31969e-18	2.99929e-20
CC	extracellular matrix component	17	4.77641e-09	1.26647e-10
CC	fibrillar collagen trimer	7	1.96446e-08	6.69704e-10
CC	banded collagen fibril	7	1.96446e-08	6.69704e-10
CC	collagen trimer	14	3.44974e-08	1.30672e-09
CC	complex of collagen trimers	7	1.37743e-06	5.7393e-08
CC	endoplasmic reticulum lumen	21	6.89203e-06	3.13274e-07
CC	apical part of cell	21	0.000186225	9.17015e-06
CC	apical plasma membrane	15	0.0140388	0.00074448
CC	Golgi lumen	7	0.0625965	0.00355662
CC	basement membrane	6	0.142941	0.0086631
CC	microvillus membrane	3	0.145883	0.009394
CC	receptor complex	14	0.204436	0.0139388
CC	microfibril	2	0.208305	0.0149917
CC	brush border membrane	4	0.223899	0.0176522
CC	catenin complex	3	0.223899	0.0178102
CC	interstitial matrix	2	0.251741	0.021438
CC	microvillus	5	0.251741	0.021932
CC	integrin complex	3	0.254973	0.0231793
CC	photoreceptor outer segment membrane	2	0.264189	0.0250179
CC	protein complex involved in cell adhesion	3	0.297808	0.0293296
CC	sarcoplasmic reticulum	4	0.306724	0.0313695
CC	lysosomal lumen	5	0.343499	0.0364317
CC	platelet alpha granule lumen	4	0.358997	0.0400443
CC	brush border	5	0.358997	0.0407951
CC	sarcoplasm	4	0.407674	0.0478708
CC	cell projection membrane	11	0.471463	0.057147
CC	connexin complex	2	0.487437	0.0609296
CC	myosin filament	2	0.513977	0.066194
CC	focal adhesion	12	0.592409	0.0785391
CC	cell-substrate adherens junction	12	0.601307	0.0819965
CC	actin-based cell projection	7	0.611153	0.0867897
CC	cell-substrate junction	12	0.611153	0.087969
CC	high-density lipoprotein particle	2	0.615094	0.094546
CC	centriolar satellite	2	0.615094	0.094546
CC	platelet alpha granule	4	0.615094	0.095526
CC	striated muscle thin filament	2	0.725671	0.119251
CC	contractile fiber part	7	0.725671	0.119894
CC	gap junction	2	0.725671	0.125656
CC	myofilament	2	0.725671	0.125656
CC	membrane raft	9	0.725671	0.129856
CC	membrane microdomain	9	0.725671	0.131718
CC	cell-cell junction	12	0.725671	0.143535
CC	cluster of actin-based cell projections	5	0.725671	0.148036
CC	lamellipodium	6	0.725671	0.152575
CC	membrane region	9	0.725671	0.153112
CC	contractile fiber	7	0.725671	0.156168
CC	myosin complex	3	0.725671	0.156487
CC	cell-cell adherens junction	4	0.725671	0.162197
CC	dendrite membrane	2	0.725671	0.165579
CC	sarcoplasmic reticulum membrane	2	0.725671	0.172436
CC	plasma lipoprotein particle	2	0.725671	0.172436
CC	lipoprotein particle	2	0.725671	0.172436
CC	fascia adherens	1	0.725671	0.176565
CC	microtubule organizing center attachment site	1	0.725671	0.176565
CC	meiotic nuclear membrane microtubule tethering complex	1	0.725671	0.176565
CC	nuclear membrane protein complex	1	0.725671	0.176565
CC	nuclear membrane microtubule tethering complex	1	0.725671	0.176565
CC	sarcomere	6	0.725671	0.180143
CC	clathrin-coated endocytic vesicle membrane	2	0.725671	0.186281
CC	protein-lipid complex	2	0.725671	0.186281
CC	anchored component of membrane	5	0.725671	0.189029
CC	caveola	3	0.725671	0.189723
CC	platelet dense tubular network	1	0.725671	0.192413
CC	spanning component of membrane	1	0.725671	0.192413
CC	voltage-gated calcium channel complex	2	0.744686	0.200275
CC	integral component of Golgi membrane	2	0.760167	0.207318
CC	T-tubule	2	0.775317	0.214387
CC	dendritic spine membrane	1	0.796284	0.223201
CC	actin cytoskeleton	12	0.808713	0.230021
CC	sarcolemma	4	0.808713	0.232811
CC	vacuolar lumen	5	0.811652	0.237091
CC	intrinsic component of Golgi membrane	2	0.811652	0.242848
CC	myofibril	6	0.811652	0.246832
CC	intercalated disc	2	0.811652	0.249994
CC	chloride channel complex	2	0.811652	0.249994
CC	cation-transporting ATPase complex	1	0.811652	0.252818
CC	plasma membrane receptor complex	5	0.811652	0.262292
CC	axolemma	1	0.811652	0.267202
CC	nuclear membrane part	1	0.811652	0.267202
CC	invadopodium	1	0.811652	0.267202
CC	basal part of cell	2	0.811652	0.271455
CC	I band	4	0.811652	0.274835
CC	stress fiber	2	0.811652	0.278608
CC	contractile actin filament bundle	2	0.811652	0.278608
CC	neuron projection membrane	2	0.811652	0.285756
CC	filopodium	3	0.811652	0.291828
CC	plasma membrane raft	3	0.811652	0.291828
CC	integral component of synaptic vesicle membrane	1	0.811652	0.295146
CC	anchored component of external side of plasma membrane	1	0.811652	0.295146
CC	pore complex	1	0.811652	0.295146
CC	exocytic vesicle	5	0.815013	0.303016
CC	neuromuscular junction	2	0.815013	0.307146
CC	actin filament	3	0.815013	0.307608
CC	endocytic vesicle lumen	1	0.815013	0.308717
CC	actin filament bundle	2	0.82093	0.32134
CC	clathrin-coated endocytic vesicle	2	0.82093	0.32134
CC	pericentric heterochromatin	1	0.82093	0.322028
CC	cell leading edge	9	0.82093	0.323397
CC	basal lamina	1	0.831874	0.335083
CC	lamellipodium membrane	1	0.831874	0.347887
CC	cornified envelope	2	0.831874	0.356474
CC	calcium channel complex	2	0.831874	0.356474
CC	axoneme	3	0.831874	0.360273
CC	intrinsic component of external side of plasma membrane	1	0.831874	0.360445
CC	neuronal cell body membrane	1	0.831874	0.360445
CC	axonal growth cone	1	0.831874	0.360445
CC	cell body membrane	1	0.831874	0.360445
CC	ATPase dependent transmembrane transport complex	1	0.831874	0.360445
CC	actomyosin	2	0.831874	0.363426
CC	ciliary plasm	3	0.831874	0.36552
CC	cell-cell contact zone	2	0.847792	0.377244
CC	basolateral plasma membrane	5	0.847792	0.378937
CC	nuclear outer membrane	1	0.853769	0.384843
CC	leading edge membrane	4	0.862756	0.392162
CC	Golgi cis cisterna	1	0.865508	0.396691
CC	muscle myosin complex	1	0.876378	0.408312
CC	intrinsic component of synaptic vesicle membrane	1	0.876378	0.408312
CC	extrinsic component of plasma membrane	4	0.881096	0.413848
CC	transmembrane transporter complex	7	0.891632	0.422174
CC	Z disc	3	0.904257	0.4328
CC	synaptic vesicle	4	0.904257	0.439642
CC	integral component of organelle membrane	4	0.904257	0.439642
CC	excitatory synapse	1	0.904257	0.441853
CC	transporter complex	7	0.905213	0.447226
CC	presynaptic membrane	2	0.905213	0.450737
CC	nuclear transcriptional repressor complex	1	0.905213	0.452606
CC	early endosome	7	0.906284	0.456575
CC	euchromatin	1	0.912481	0.463153
CC	photoreceptor outer segment	2	0.918972	0.469929
CC	myosin II complex	1	0.919142	0.473497
CC	cell cortex region	1	0.930776	0.483643
CC	ciliary membrane	2	0.930776	0.488714
CC	basal plasma membrane	1	0.930776	0.493593
CC	presynaptic active zone	1	0.930776	0.493593
CC	ion channel complex	6	0.94177	0.505987
CC	intrinsic component of organelle membrane	4	0.94177	0.506558
CC	filamentous actin	1	0.945085	0.512924
CC	rough endoplasmic reticulum	2	0.945085	0.519081
CC	ruffle membrane	2	0.945085	0.519081
CC	Golgi cisterna membrane	2	0.94933	0.525008
CC	voltage-gated potassium channel complex	2	0.953429	0.530887
CC	synaptonemal complex	1	0.966759	0.549406
CC	synaptonemal structure	1	0.966759	0.549406
CC	multivesicular body	1	0.966759	0.558092
CC	aggresome	1	0.966759	0.558092
CC	synaptic vesicle membrane	2	0.966759	0.565106
CC	exocytic vesicle membrane	2	0.966759	0.565106
CC	potassium channel complex	2	0.966759	0.570633
CC	growth cone	3	0.966759	0.57131
CC	synaptic membrane	6	0.966759	0.573023
CC	motile cilium	3	0.966759	0.580076
CC	clathrin-coated vesicle membrane	2	0.966759	0.586905
CC	site of polarized growth	3	0.966759	0.593012
CC	endocytic vesicle membrane	3	0.966759	0.593012
CC	cortical cytoskeleton	2	0.966759	0.602718
CC	cation channel complex	4	0.966759	0.603176
CC	anchored component of plasma membrane	1	0.966759	0.606814
CC	nuclear matrix	2	0.966759	0.607886
CC	9+0 non-motile cilium	2	0.966759	0.607886
CC	photoreceptor cell cilium	2	0.966759	0.607886
CC	ruffle	3	0.970622	0.613992
CC	cytoplasmic vesicle lumen	6	0.99097	0.635295
CC	Golgi cisterna	2	0.99097	0.637825
CC	vesicle lumen	6	0.99097	0.638125
CC	endocytic vesicle	5	0.999297	0.652794
CC	tertiary granule lumen	1	0.999297	0.656926
CC	plasma membrane bounded cell projection cytoplasm	3	0.999297	0.67613
CC	azurophil granule membrane	1	0.999297	0.676403
CC	nuclear inner membrane	1	0.999297	0.682647
CC	endoplasmic reticulum-Golgi intermediate compartment	2	0.999297	0.68801
CC	histone deacetylase complex	1	0.999297	0.694777
CC	cytoplasmic microtubule	1	0.999297	0.694777
CC	nuclear membrane	5	0.999297	0.695935
CC	specific granule lumen	1	0.999297	0.700667
CC	cis-Golgi network	1	0.999297	0.706444
CC	main axon	1	0.999297	0.706444
CC	nuclear periphery	2	0.999297	0.720816
CC	clathrin-coated pit	1	0.999297	0.728462
CC	non-motile cilium	2	0.999297	0.732349
CC	presynapse	6	0.999297	0.740169
CC	secretory granule lumen	5	0.999297	0.742669
CC	tethering complex	1	0.999297	0.743887
CC	early endosome membrane	2	0.999297	0.747095
CC	apical junction complex	2	0.999297	0.754204
CC	heterochromatin	1	0.999297	0.758438
CC	cortical actin cytoskeleton	1	0.999297	0.767678
CC	Golgi stack	2	0.999297	0.767906
CC	inclusion body	1	0.999297	0.789265
CC	extrinsic component of membrane	4	0.999297	0.807702
CC	transcriptional repressor complex	1	0.999297	0.808851
CC	sperm flagellum	1	0.999297	0.808851
CC	9+2 motile cilium	1	0.999297	0.808851
CC	myelin sheath	2	0.999297	0.824265
CC	cell cortex part	2	0.999297	0.829423
CC	autophagosome	1	0.999297	0.83326
CC	intermediate filament cytoskeleton	3	0.999297	0.835297
CC	coated vesicle membrane	2	0.999297	0.839331
CC	late endosome	3	0.999297	0.839469
CC	condensed nuclear chromosome	1	0.999297	0.842744
CC	keratin filament	1	0.999297	0.845785
CC	microtubule organizing center part	2	0.999297	0.846418
CC	ATPase complex	1	0.999297	0.848767
CC	postsynaptic membrane	3	0.999297	0.851444
CC	PML body	1	0.999297	0.854559
CC	transport vesicle	5	0.999297	0.855588
CC	clathrin-coated vesicle	2	0.999297	0.857602
CC	neuronal cell body	6	0.999297	0.86467
CC	melanosome	1	0.999297	0.873144
CC	pigment granule	1	0.999297	0.873144
CC	cytoplasmic region	6	0.999297	0.888689
CC	distal axon	3	0.999297	0.891888
CC	intermediate filament	2	0.999297	0.895276
CC	perikaryon	1	0.999297	0.899661
CC	transport vesicle membrane	2	0.999297	0.900056
CC	bicellular tight junction	1	0.999297	0.905377
CC	occluding junction	1	0.999297	0.910768
CC	ficolin-1-rich granule lumen	1	0.999297	0.910768
CC	ciliary part	5	0.999297	0.918439
CC	fibrillar center	1	0.999297	0.925171
CC	cell cortex	3	0.999297	0.92538
CC	postsynaptic density	2	0.999297	0.933735
CC	postsynaptic specialization	2	0.999297	0.935824
CC	asymmetric synapse	2	0.999297	0.938841
CC	nuclear envelope	5	0.999297	0.939343
CC	neuron to neuron synapse	2	0.999297	0.941723
CC	spindle pole	1	0.999297	0.949412
CC	dendritic spine	1	0.999297	0.949412
CC	primary lysosome	1	0.999297	0.951356
CC	azurophil granule	1	0.999297	0.951356
CC	neuron spine	1	0.999297	0.951356
CC	specific granule	1	0.999297	0.955022
CC	microtubule	4	0.999297	0.955583
CC	tertiary granule	1	0.999297	0.958412
CC	centrosome	5	0.999297	0.961044
CC	transcription factor complex	3	0.999297	0.962511
CC	lysosomal membrane	3	0.999297	0.967653
CC	axon part	3	0.999297	0.967653
CC	lytic vacuole membrane	3	0.999297	0.967653
CC	nucleolar part	1	0.999297	0.96961
CC	coated vesicle	2	0.999297	0.969707
CC	ficolin-1-rich granule	1	0.999297	0.972449
CC	endosome membrane	4	0.999297	0.974908
CC	postsynapse	4	0.999297	0.974908
CC	mitochondrial matrix	4	0.999297	0.975932
CC	sperm part	1	0.999297	0.976452
CC	chromosome, centromeric region	1	0.999297	0.977358
CC	nuclear speck	3	0.999297	0.978415
CC	trans-Golgi network	1	0.999297	0.979068
CC	organelle outer membrane	1	0.999297	0.980266
CC	outer membrane	1	0.999297	0.981026
CC	condensed chromosome	1	0.999297	0.985303
CC	endosomal part	4	0.999297	0.986716
CC	vacuolar membrane	3	0.999297	0.986779
CC	nuclear chromatin	2	0.999297	0.992197
CC	secretory granule membrane	1	0.999297	0.9973
CC	spindle	1	0.999297	0.998217
CC	chromosomal region	1	0.999297	0.998891
CC	mitochondrial inner membrane	2	0.999297	0.999297
BP	complement activation, classical pathway	67	1.87942e-78	5.85126e-82
BP	humoral immune response mediated by circulating immunoglobulin	67	2.1065e-75	1.31165e-78
BP	complement activation	67	2.16275e-70	2.02e-73
BP	protein activation cascade	68	3.77009e-67	4.69501e-70
BP	immunoglobulin mediated immune response	67	6.90738e-63	1.07525e-65
BP	B cell mediated immunity	67	8.63047e-63	1.61217e-65
BP	adaptive immune response based on somatic recombination of immune receptors built from immunoglobulin superfamily domains	69	2.21122e-50	4.81897e-53
BP	humoral immune response	70	4.46815e-50	1.11286e-52
BP	lymphocyte mediated immunity	68	4.75369e-49	1.33198e-51
BP	phagocytosis	68	1.21253e-47	3.77499e-50
BP	regulation of complement activation	44	7.87764e-45	2.69782e-47
BP	regulation of protein activation cascade	44	1.20571e-44	4.50454e-47
BP	regulation of humoral immune response	44	2.83284e-41	1.14654e-43
BP	immune response-activating cell surface receptor signaling pathway	68	1.15455e-38	5.03228e-41
BP	regulation of acute inflammatory response	44	9.79235e-38	4.57302e-40
BP	phagocytosis, recognition	32	1.79523e-37	8.9426e-40
BP	immune response-regulating cell surface receptor signaling pathway involved in phagocytosis	42	2.67395e-37	1.49848e-39
BP	Fc-gamma receptor signaling pathway involved in phagocytosis	42	2.67395e-37	1.49848e-39
BP	immune response-regulating cell surface receptor signaling pathway	68	8.45973e-37	5.0042e-39
BP	Fc-gamma receptor signaling pathway	42	1.01831e-36	6.34063e-39
BP	Fc receptor mediated stimulatory signaling pathway	42	1.37925e-36	9.0175e-39
BP	regulation of protein processing	45	1.69244e-36	1.1592e-38
BP	acute inflammatory response	49	2.80331e-36	2.08566e-38
BP	regulation of protein maturation	45	2.80331e-36	2.09463e-38
BP	leukocyte migration	61	1.10527e-30	8.60264e-33
BP	phagocytosis, engulfment	32	2.92008e-30	2.3637e-32
BP	B cell receptor signaling pathway	32	4.9068e-29	4.17452e-31
BP	protein processing	51	4.9068e-29	4.27741e-31
BP	plasma membrane invagination	32	9.99239e-29	9.02178e-31
BP	membrane invagination	32	1.74074e-27	1.62584e-29
BP	receptor-mediated endocytosis	49	6.42958e-27	6.20539e-29
BP	regulation of inflammatory response	53	1.36322e-26	1.35813e-28
BP	Fc-epsilon receptor signaling pathway	38	1.53153e-26	1.57349e-28
BP	protein maturation	51	1.74292e-25	1.84494e-27
BP	Fc receptor signaling pathway	42	1.99654e-25	2.17556e-27
BP	positive regulation of B cell activation	31	1.38722e-24	1.5548e-26
BP	regulation of B cell activation	33	8.12263e-23	9.35671e-25
BP	regulation of immune effector process	48	4.46577e-22	5.28329e-24
BP	cell recognition	34	1.93377e-21	2.34798e-23
BP	defense response to bacterium	37	1.06501e-17	1.32629e-19
BP	positive regulation of lymphocyte activation	37	8.07582e-17	1.03085e-18
BP	positive regulation of cell activation	39	1.81271e-16	2.3703e-18
BP	positive regulation of leukocyte activation	38	4.54179e-16	6.08022e-18
BP	B cell activation	34	4.78958e-16	6.56107e-18
BP	antigen receptor-mediated signaling pathway	34	1.04283e-15	1.461e-17
BP	regulation of lymphocyte activation	40	1.04946e-13	1.50296e-15
BP	extracellular matrix organization	30	4.58036e-10	6.70228e-12
BP	immunoglobulin production	20	5.73507e-10	8.57046e-12
BP	extracellular structure organization	30	1.70644e-08	2.60323e-10
BP	production of molecular mediator of immune response	22	3.2843e-08	5.11254e-10
BP	skeletal system development	31	7.92539e-07	1.25839e-08
BP	collagen fibril organization	10	8.33902e-07	1.35003e-08
BP	cell-substrate adhesion	24	1.07573e-06	1.77502e-08
BP	cell-matrix adhesion	19	1.52187e-06	2.55856e-08
BP	negative regulation of embryonic development	7	2.25743e-05	3.86546e-07
BP	positive regulation of cell migration	27	4.99202e-05	8.70341e-07
BP	regulation of cell-substrate adhesion	16	5.44147e-05	9.65641e-07
BP	positive regulation of cell-substrate adhesion	12	7.32036e-05	1.32186e-06
BP	positive regulation of cell motility	27	8.94159e-05	1.64245e-06
BP	positive regulation of cell-matrix adhesion	8	0.00015329	2.86345e-06
BP	connective tissue development	17	0.00027967	5.3113e-06
BP	collagen catabolic process	9	0.000372677	7.19365e-06
BP	retina homeostasis	9	0.000467548	9.17046e-06
BP	cartilage development	14	0.000788263	1.57064e-05
BP	collagen metabolic process	11	0.00107888	2.18329e-05
BP	glomerulus development	8	0.00121624	2.49913e-05
BP	regulation of cell-matrix adhesion	10	0.00159842	3.33418e-05
BP	glomerular filtration	5	0.00166298	3.52064e-05
BP	sensory organ morphogenesis	16	0.00189838	4.0781e-05
BP	renal system development	17	0.00199932	4.35718e-05
BP	renal filtration	5	0.0020568	4.54647e-05
BP	positive regulation of phosphatidylinositol 3-kinase signaling	8	0.00248288	5.56562e-05
BP	regulation of non-canonical Wnt signaling pathway	5	0.00254716	5.78901e-05
BP	glomerulus vasculature development	5	0.0031591	7.27811e-05
BP	positive regulation of cell adhesion	20	0.00377334	8.81074e-05
BP	positive regulation of focal adhesion assembly	5	0.00382297	9.04564e-05
BP	cell adhesion mediated by integrin	7	0.00452339	0.000110368
BP	renal system vasculature development	5	0.00452339	0.000111254
BP	kidney vasculature development	5	0.00452339	0.000111254
BP	regulation of angiogenesis	18	0.00486539	0.00012118
BP	positive regulation of adherens junction organization	5	0.00537439	0.000135531
BP	ossification	19	0.00540784	0.000138058
BP	convergent extension	4	0.00653224	0.000170831
BP	establishment of planar polarity involved in neural tube closure	4	0.00653224	0.000170831
BP	positive regulation of phospholipid metabolic process	6	0.00700989	0.000185504
BP	urogenital system development	17	0.00710422	0.000190213
BP	embryonic organ morphogenesis	16	0.0075137	0.000203515
BP	positive regulation of angiogenesis	12	0.00896434	0.000245598
BP	kidney development	15	0.00907315	0.000251404
BP	positive regulation of chemotaxis	10	0.00915581	0.000256545
BP	skeletal system morphogenesis	13	0.0094689	0.000270617
BP	mesenchyme morphogenesis	6	0.0094689	0.000271214
BP	positive regulation of phosphatidylinositol 3-kinase activity	5	0.00950562	0.000275225
BP	establishment of planar polarity of embryonic epithelium	4	0.00986513	0.000288705
BP	regulation of vasculature development	18	0.010641	0.000314725
BP	positive regulation of cell junction assembly	5	0.0108035	0.000322895
BP	embryonic organ development	20	0.0114413	0.000345517
BP	regulation of epithelial tube formation	4	0.0119778	0.00036545
BP	vascular endothelial growth factor signaling pathway	5	0.0140269	0.000436702
BP	positive regulation of lipid kinase activity	5	0.0140269	0.000436702
BP	cell junction assembly	13	0.0160221	0.000503807
BP	regulation of fat cell differentiation	9	0.0173694	0.000551581
BP	cell-cell adhesion mediated by cadherin	5	0.0180362	0.000578373
BP	regulation of chemotaxis	12	0.0188161	0.000609239
BP	positive regulation of vasculature development	12	0.0194833	0.000636907
BP	negative regulation of cellular response to growth factor stimulus	10	0.0195821	0.000646235
BP	inner ear morphogenesis	8	0.0213402	0.000710897
BP	cardiac chamber morphogenesis	9	0.022162	0.000745172
BP	formation of primary germ layer	9	0.0232751	0.000789845
BP	regulation of phosphatidylinositol 3-kinase signaling	8	0.0237279	0.0008126
BP	positive regulation of fat cell differentiation	6	0.0253568	0.000876278
BP	heart morphogenesis	13	0.0264912	0.000923726
BP	lymphocyte chemotaxis	6	0.0273283	0.000961424
BP	phosphatidylinositol 3-kinase signaling	9	0.0295035	0.00104713
BP	regulation of cell adhesion mediated by integrin	5	0.0301111	0.00108167
BP	regulation of cell junction assembly	7	0.0301111	0.00108745
BP	collagen-activated signaling pathway	3	0.0305115	0.00111537
BP	cardiac chamber development	10	0.0305115	0.00113041
BP	phosphatidylinositol-mediated signaling	10	0.0305115	0.00113041
BP	gastrulation	11	0.0305533	0.00114147
BP	inositol lipid-mediated signaling	10	0.0346267	0.00130443
BP	keratan sulfate catabolic process	3	0.038584	0.00146552
BP	regulation of interleukin-1 secretion	5	0.0393774	0.00150791
BP	artery development	7	0.0400367	0.00154563
BP	trabecula formation	4	0.0405141	0.00157667
BP	nephron development	9	0.0406993	0.00159655
BP	positive regulation of leukocyte chemotaxis	7	0.0413759	0.00165302
BP	roof of mouth development	7	0.0413759	0.00165302
BP	mesenchyme development	13	0.0413759	0.00166173
BP	cellular response to transforming growth factor beta stimulus	12	0.0450943	0.00182511
BP	regulation of phosphatidylinositol 3-kinase activity	5	0.0453418	0.00185345
BP	cellular response to X-ray	3	0.0453418	0.00187748
BP	planar cell polarity pathway involved in neural tube closure	3	0.0453418	0.00187748
BP	negative regulation of transmembrane receptor protein serine/threonine kinase signaling pathway	8	0.0454479	0.00189602
BP	antibacterial humoral response	5	0.0483312	0.0020464
BP	endodermal cell differentiation	5	0.0483312	0.0020464
BP	response to transforming growth factor beta	12	0.0495264	0.00211243
BP	artery morphogenesis	6	0.0513377	0.0022059
BP	ear morphogenesis	8	0.0513377	0.00223325
BP	eye morphogenesis	9	0.0513377	0.00224831
BP	regulation of endothelial cell apoptotic process	5	0.0513377	0.00225362
BP	lymphocyte migration	7	0.051557	0.00227987
BP	osteoblast differentiation	11	0.051557	0.00229535
BP	regulation of respiratory burst	3	0.051894	0.00235481
BP	regulation of establishment of planar polarity involved in neural tube closure	3	0.051894	0.00235481
BP	aminoglycan catabolic process	6	0.051894	0.00237669
BP	endocardial cushion morphogenesis	4	0.051894	0.00239113
BP	cellular response to vitamin	4	0.051894	0.00239113
BP	transmembrane receptor protein serine/threonine kinase signaling pathway	15	0.0553215	0.00256628
BP	positive regulation of interleukin-1 secretion	4	0.0581726	0.00271665
BP	regulation of interleukin-1 production	6	0.0584521	0.0027479
BP	fat cell differentiation	11	0.0586142	0.00277377
BP	cell-cell junction organization	12	0.0587475	0.00279837
BP	cell junction organization	13	0.0590872	0.00283295
BP	sulfur compound catabolic process	5	0.0610868	0.00296685
BP	interleukin-1 secretion	5	0.0610868	0.00296685
BP	positive regulation of leukocyte migration	8	0.0615727	0.00304796
BP	regulation of embryonic development	8	0.0615727	0.00304796
BP	embryonic skeletal system development	8	0.0615727	0.00304796
BP	negative regulation of endothelial cell apoptotic process	4	0.061656	0.00307128
BP	Notch signaling pathway	10	0.0618931	0.00310236
BP	response to estrogen	6	0.0622878	0.00316093
BP	regulation of epithelial cell apoptotic process	6	0.0622878	0.00316093
BP	tissue homeostasis	11	0.0629051	0.00321184
BP	positive regulation of fibroblast proliferation	5	0.0630166	0.00323715
BP	regulation of phospholipid metabolic process	6	0.0654784	0.003384
BP	epithelial to mesenchymal transition involved in endocardial cushion formation	3	0.0669909	0.00351848
BP	semi-lunar valve development	3	0.0669909	0.00351848
BP	cellular response to vascular endothelial growth factor stimulus	5	0.0669909	0.00352474
BP	canonical Wnt signaling pathway	14	0.0687664	0.00363956
BP	regulation of lipid kinase activity	5	0.0719453	0.00383021
BP	muscle contraction	15	0.0724599	0.00388017
BP	adherens junction organization	8	0.075701	0.0040773
BP	regulation of focal adhesion assembly	5	0.0758139	0.00415419
BP	endothelial cell apoptotic process	5	0.0758139	0.00415419
BP	regulation of cell-substrate junction assembly	5	0.0758139	0.00415419
BP	positive regulation of cell adhesion mediated by integrin	3	0.0759795	0.00421057
BP	midbrain dopaminergic neuron differentiation	3	0.0759795	0.00421057
BP	digestive tract development	8	0.0802511	0.00447407
BP	endoderm formation	5	0.0802511	0.00449726
BP	regulation of transmembrane receptor protein serine/threonine kinase signaling pathway	11	0.0831636	0.00470862
BP	cell fate commitment	12	0.0831636	0.00471226
BP	positive regulation of small GTPase mediated signal transduction	5	0.0853027	0.00486002
BP	epithelial to mesenchymal transition	8	0.085535	0.00489989
BP	chemokine-mediated signaling pathway	6	0.0859917	0.00497659
BP	negative regulation of morphogenesis of an epithelium	3	0.0859917	0.0049796
BP	regulation of canonical Wnt signaling pathway	12	0.0887432	0.00516656
BP	regulation of adherens junction organization	5	0.0895785	0.00524307
BP	interleukin-1 production	6	0.089603	0.00528772
BP	response to vitamin D	4	0.089603	0.00532297
BP	reproductive structure development	17	0.089603	0.00534947
BP	positive regulation of canonical Wnt signaling pathway	8	0.089603	0.00535609
BP	response to acid chemical	14	0.0937984	0.00563608
BP	reproductive system development	17	0.0947605	0.00572339
BP	positive regulation of glycoprotein biosynthetic process	3	0.0949432	0.00582782
BP	release of sequestered calcium ion into cytosol	7	0.0949432	0.0058448
BP	negative regulation of sequestering of calcium ion	7	0.0949432	0.0058448
BP	muscle system process	17	0.0949432	0.00585266
BP	positive chemotaxis	5	0.0980127	0.00607239
BP	regulation of sequestering of calcium ion	7	0.0985984	0.00613938
BP	negative regulation of canonical Wnt signaling pathway	9	0.09926	0.00621147
BP	mesenchymal cell differentiation	10	0.0996065	0.00626417
BP	regulation of fibroblast proliferation	6	0.0997876	0.00630663
BP	regulation of cellular response to growth factor stimulus	12	0.100184	0.00636288
BP	regulation of leukocyte chemotaxis	7	0.100854	0.0064449
BP	positive regulation of release of sequestered calcium ion into cytosol	4	0.100854	0.00646819
BP	fibroblast proliferation	6	0.10359	0.00667596
BP	positive regulation of ERK1 and ERK2 cascade	11	0.103657	0.00671256
BP	copper ion transport	3	0.103849	0.00675728
BP	substrate adhesion-dependent cell spreading	6	0.106726	0.00706074
BP	renal system process	7	0.106726	0.0070897
BP	sequestering of calcium ion	7	0.106726	0.0070897
BP	endocardial cushion development	4	0.106726	0.0070975
BP	cell chemotaxis	12	0.106726	0.00713898
BP	regulation of ERK1 and ERK2 cascade	13	0.106726	0.00718241
BP	response to BMP	9	0.106726	0.00721033
BP	cellular response to BMP stimulus	9	0.106726	0.00721033
BP	cell-cell junction assembly	7	0.109465	0.00742948
BP	glycosaminoglycan catabolic process	5	0.109678	0.00748308
BP	digestive system development	8	0.109678	0.00751217
BP	phenol-containing compound biosynthetic process	4	0.111913	0.00776592
BP	endocardial cushion formation	3	0.111913	0.0077698
BP	uterus development	3	0.111913	0.0077698
BP	cellular response to amino acid stimulus	5	0.114715	0.00800002
BP	sex differentiation	12	0.117229	0.00821187
BP	cell-substrate junction assembly	6	0.117602	0.00831125
BP	response to vitamin	6	0.117602	0.00831125
BP	negative regulation of epithelial cell apoptotic process	4	0.119385	0.00847442
BP	positive regulation of calcium ion transmembrane transport	5	0.119801	0.00854125
BP	axonogenesis	17	0.127978	0.00916408
BP	collagen biosynthetic process	4	0.128257	0.00922393
BP	regulation of morphogenesis of an epithelium	9	0.132525	0.00957216
BP	ventricular septum development	5	0.13351	0.00969869
BP	cardiac ventricle development	7	0.13351	0.00972646
BP	negative regulation of cellular component movement	13	0.133625	0.00977646
BP	muscle tissue development	15	0.133948	0.00999179
BP	positive regulation of interleukin-1 production	4	0.133948	0.0100153
BP	T cell chemotaxis	3	0.133948	0.0100503
BP	regulation of osteoblast proliferation	3	0.133948	0.0100503
BP	motile cilium assembly	3	0.133948	0.0100503
BP	positive regulation of glycoprotein metabolic process	3	0.133948	0.0100503
BP	cardiac muscle tissue development	10	0.135306	0.0101943
BP	inner ear development	9	0.135416	0.0102447
BP	gonad development	10	0.138365	0.0105109
BP	extracellular matrix disassembly	6	0.140411	0.0107369
BP	negative regulation of cell adhesion	11	0.140411	0.0107538
BP	ERK1 and ERK2 cascade	13	0.143725	0.0110523
BP	developmental growth involved in morphogenesis	10	0.143726	0.0111665
BP	negative regulation of cell motility	12	0.143726	0.0113029
BP	response to prostaglandin E	3	0.143726	0.0113209
BP	negative regulation of myoblast differentiation	3	0.143726	0.0113209
BP	negative regulation of cartilage development	3	0.143726	0.0113209
BP	cochlea morphogenesis	3	0.143726	0.0113209
BP	non-canonical Wnt signaling pathway	8	0.144472	0.0114696
BP	positive regulation of protein kinase B signaling	8	0.144472	0.0114696
BP	positive regulation of lipid metabolic process	7	0.144557	0.0115213
BP	epithelial cell differentiation involved in kidney development	4	0.145998	0.0117271
BP	embryonic cranial skeleton morphogenesis	4	0.145998	0.0117271
BP	negative regulation of developmental growth	6	0.146203	0.0118346
BP	epithelial cell apoptotic process	6	0.146203	0.0118346
BP	calcium ion transmembrane import into cytosol	7	0.147741	0.0120051
BP	integrin-mediated signaling pathway	6	0.152167	0.0124121
BP	development of primary sexual characteristics	10	0.152539	0.0125702
BP	cochlea development	4	0.152539	0.0126491
BP	regulation of extrinsic apoptotic signaling pathway in absence of ligand	4	0.152539	0.0126491
BP	monovalent inorganic anion homeostasis	3	0.152539	0.0126799
BP	positive regulation of T cell migration	3	0.152539	0.0126799
BP	negative regulation of locomotion	13	0.160106	0.0133588
BP	positive regulation of cytosolic calcium ion concentration	12	0.160968	0.0134808
BP	cardiac septum development	6	0.162099	0.013626
BP	cyclic-nucleotide-mediated signaling	8	0.162428	0.0137042
BP	osteoblast proliferation	3	0.166226	0.0141281
BP	positive regulation of Rho protein signal transduction	3	0.166226	0.0141281
BP	male sex differentiation	8	0.166306	0.0141868
BP	mesoderm formation	5	0.167216	0.0145908
BP	outflow tract morphogenesis	5	0.167216	0.0145908
BP	cell-substrate adherens junction assembly	5	0.167216	0.0145908
BP	focal adhesion assembly	5	0.167216	0.0145908
BP	aorta development	4	0.167216	0.0146288
BP	positive regulation of receptor-mediated endocytosis	4	0.167216	0.0146288
BP	retina morphogenesis in camera-type eye	4	0.167216	0.0146288
BP	positive regulation of endocytosis	7	0.170559	0.0152206
BP	regulation of release of sequestered calcium ion into cytosol	5	0.170559	0.0154029
BP	cytokine secretion	9	0.170559	0.0155166
BP	substrate-dependent cell migration	3	0.170559	0.0156664
BP	positive regulation of Ras protein signal transduction	4	0.170559	0.015688
BP	trabecula morphogenesis	4	0.170559	0.015688
BP	luteinization	2	0.170559	0.0157178
BP	establishment of T cell polarity	2	0.170559	0.0157178
BP	negative regulation of cell adhesion mediated by integrin	2	0.170559	0.0157178
BP	vagina development	2	0.170559	0.0157178
BP	bone trabecula formation	2	0.170559	0.0157178
BP	dendritic cell apoptotic process	2	0.170559	0.0157178
BP	regulation of dopaminergic neuron differentiation	2	0.170559	0.0157178
BP	regulation of platelet-derived growth factor receptor-beta signaling pathway	2	0.170559	0.0157178
BP	regulation of dendritic cell apoptotic process	2	0.170559	0.0157178
BP	negative regulation of cell development	12	0.172668	0.0159659
BP	mesoderm morphogenesis	5	0.175093	0.0162446
BP	negative regulation of BMP signaling pathway	4	0.179212	0.0167942
BP	regulation of myoblast differentiation	4	0.179212	0.0167942
BP	digestive tract morphogenesis	4	0.179212	0.0167942
BP	regulation of Wnt signaling pathway	13	0.181601	0.0171149
BP	response to tumor necrosis factor	12	0.181601	0.0171311
BP	negative regulation of response to external stimulus	12	0.187781	0.0179428
BP	negative regulation of blood coagulation	4	0.187781	0.017948
BP	T cell migration	4	0.187781	0.017948
BP	negative regulation of hemostasis	4	0.187781	0.017948
BP	establishment of lymphocyte polarity	2	0.189844	0.0189627
BP	negative regulation of cell fate commitment	2	0.189844	0.0189627
BP	cyclooxygenase pathway	2	0.189844	0.0189627
BP	positive regulation of osteoblast proliferation	2	0.189844	0.0189627
BP	vitamin D biosynthetic process	2	0.189844	0.0189627
BP	xenobiotic glucuronidation	2	0.189844	0.0189627
BP	rRNA base methylation	2	0.189844	0.0189627
BP	AV node cell action potential	2	0.189844	0.0189627
BP	AV node cell to bundle of His cell signaling	2	0.189844	0.0189627
BP	regulation of synapse maturation	2	0.189844	0.0189627
BP	positive regulation of membrane depolarization	2	0.189844	0.0189627
BP	male gonad development	7	0.189844	0.0190063
BP	keratan sulfate biosynthetic process	3	0.189844	0.0190148
BP	negative regulation of intrinsic apoptotic signaling pathway in response to DNA damage	3	0.189844	0.0190148
BP	eye development	13	0.189844	0.0190659
BP	positive regulation of Wnt signaling pathway	8	0.189844	0.0191015
BP	positive regulation of calcium ion transport into cytosol	4	0.189844	0.0191499
BP	positive regulation of endothelial cell migration	6	0.190272	0.0193115
BP	positive regulation of calcium ion transport	6	0.190272	0.0193115
BP	negative regulation of Wnt signaling pathway	9	0.192735	0.0196215
BP	development of primary male sexual characteristics	7	0.192876	0.019696
BP	axon development	17	0.193667	0.019837
BP	endoderm development	5	0.193851	0.0199162
BP	antimicrobial humoral response	6	0.194659	0.0201204
BP	camera-type eye morphogenesis	6	0.194659	0.0201204
BP	visual perception	9	0.194697	0.020185
BP	regulation of cytokine secretion	8	0.19561	0.0203405
BP	Wnt signaling pathway	17	0.196875	0.0205334
BP	positive regulation of neutrophil chemotaxis	3	0.198273	0.0208257
BP	aminoglycan metabolic process	8	0.198273	0.020981
BP	organic hydroxy compound biosynthetic process	10	0.198273	0.0211155
BP	cell-cell signaling by wnt	17	0.198273	0.0212484
BP	response to nutrient	9	0.198273	0.0213468
BP	negative regulation of coagulation	4	0.198273	0.0217002
BP	regulation of leukocyte migration	8	0.198273	0.0223047
BP	pulmonary valve development	2	0.198273	0.0224622
BP	pulmonary valve morphogenesis	2	0.198273	0.0224622
BP	regulation of T cell chemotaxis	2	0.198273	0.0224622
BP	cGMP-mediated signaling	2	0.198273	0.0224622
BP	regulation of vitamin metabolic process	2	0.198273	0.0224622
BP	phosphate ion homeostasis	2	0.198273	0.0224622
BP	cartilage morphogenesis	2	0.198273	0.0224622
BP	negative regulation of androgen receptor signaling pathway	2	0.198273	0.0224622
BP	divalent inorganic anion homeostasis	2	0.198273	0.0224622
BP	trivalent inorganic anion homeostasis	2	0.198273	0.0224622
BP	AV node cell to bundle of His cell communication	2	0.198273	0.0224622
BP	positive regulation of execution phase of apoptosis	2	0.198273	0.0224622
BP	regulation of endothelial cell development	2	0.198273	0.0224622
BP	regulation of establishment of endothelial barrier	2	0.198273	0.0224622
BP	positive regulation of non-canonical Wnt signaling pathway	2	0.198273	0.0224622
BP	positive regulation of extrinsic apoptotic signaling pathway in absence of ligand	2	0.198273	0.0224622
BP	ear development	9	0.198273	0.022556
BP	sensory perception of light stimulus	9	0.198273	0.022556
BP	calcium ion transport into cytosol	7	0.198273	0.0226295
BP	regulation of osteoblast differentiation	6	0.198273	0.0226843
BP	axis elongation	3	0.198273	0.022728
BP	response to prostaglandin	3	0.198273	0.022728
BP	aorta morphogenesis	3	0.198273	0.022728
BP	cardiac epithelial to mesenchymal transition	3	0.198273	0.022728
BP	cellular response to interleukin-4	3	0.198273	0.022728
BP	positive regulation of lymphocyte migration	3	0.198273	0.022728
BP	negative regulation of growth	10	0.198273	0.0227779
BP	myoblast differentiation	5	0.198485	0.0230003
BP	positive regulation of ossification	5	0.198485	0.0230003
BP	positive regulation of cyclic nucleotide metabolic process	4	0.198485	0.0230495
BP	cell differentiation involved in kidney development	4	0.198485	0.0230495
BP	muscle organ development	14	0.199588	0.0232397
BP	regulation of developmental growth	12	0.205058	0.0239405
BP	adherens junction assembly	5	0.205271	0.0240932
BP	regulation of JUN kinase activity	5	0.205271	0.0240932
BP	negative regulation of cell-substrate adhesion	4	0.207749	0.0244486
BP	respiratory burst	3	0.208962	0.0247216
BP	positive regulation of granulocyte chemotaxis	3	0.208962	0.0247216
BP	cyclic nucleotide metabolic process	7	0.2099	0.0250187
BP	regulation of epithelial cell differentiation	7	0.2099	0.0250187
BP	regulation of epithelial to mesenchymal transition	5	0.2099	0.0252189
BP	cellular response to tumor necrosis factor	11	0.2099	0.025831
BP	sprouting angiogenesis	7	0.2099	0.0258521
BP	regulation of interleukin-1 beta production	4	0.2099	0.0258981
BP	positive regulation of osteoblast differentiation	4	0.2099	0.0258981
BP	positive regulation of reproductive process	4	0.2099	0.0258981
BP	immunological synapse formation	2	0.2099	0.0262048
BP	cellular anion homeostasis	2	0.2099	0.0262048
BP	cellular monovalent inorganic anion homeostasis	2	0.2099	0.0262048
BP	regulation of microvillus organization	2	0.2099	0.0262048
BP	platelet-derived growth factor receptor-beta signaling pathway	2	0.2099	0.0262048
BP	regulation of secondary metabolic process	2	0.2099	0.0262048
BP	establishment of epithelial cell apical/basal polarity	2	0.2099	0.0262048
BP	bone trabecula morphogenesis	2	0.2099	0.0262048
BP	protein heterotrimerization	2	0.2099	0.0262048
BP	regulation of nephron tubule epithelial cell differentiation	2	0.2099	0.0262048
BP	negative regulation of substrate adhesion-dependent cell spreading	2	0.2099	0.0262048
BP	regulation of Wnt signaling pathway, planar cell polarity pathway	2	0.2099	0.0262048
BP	negative regulation of stem cell proliferation	2	0.2099	0.0262048
BP	somite development	5	0.21076	0.0263778
BP	regulation of cytosolic calcium ion concentration	12	0.21202	0.0266015
BP	positive regulation of phospholipase C activity	3	0.212075	0.0268065
BP	positive regulation of neutrophil migration	3	0.212075	0.0268065
BP	regulation of T cell migration	3	0.212075	0.0268065
BP	female sex differentiation	6	0.215946	0.0274302
BP	positive regulation of cytokine secretion	6	0.215946	0.0274302
BP	cAMP-mediated signaling	7	0.216558	0.0275755
BP	regulation of ossification	8	0.220845	0.0281901
BP	hormone metabolic process	9	0.223579	0.0286087
BP	iron ion homeostasis	5	0.223778	0.0287964
BP	positive regulation of cAMP metabolic process	3	0.223778	0.0289824
BP	keratan sulfate metabolic process	3	0.223778	0.0289824
BP	axonemal dynein complex assembly	3	0.223778	0.0289824
BP	response to interleukin-4	3	0.223778	0.0289824
BP	hair follicle development	5	0.22649	0.0300565
BP	regulation of BMP signaling pathway	5	0.22649	0.0300565
BP	bone morphogenesis	5	0.22649	0.0300565
BP	negative regulation of ATPase activity	2	0.22649	0.0301798
BP	genitalia morphogenesis	2	0.22649	0.0301798
BP	response to potassium ion	2	0.22649	0.0301798
BP	fat-soluble vitamin biosynthetic process	2	0.22649	0.0301798
BP	negative regulation of JUN kinase activity	2	0.22649	0.0301798
BP	negative regulation of DNA damage response, signal transduction by p53 class mediator	2	0.22649	0.0301798
BP	regulation of fibrinolysis	2	0.22649	0.0301798
BP	glomerular mesangium development	2	0.22649	0.0301798
BP	response to antimetabolite	2	0.22649	0.0301798
BP	regulation of lipid metabolic process	13	0.226553	0.0302587
BP	monocyte chemotaxis	4	0.22783	0.0305513
BP	endothelium development	6	0.22783	0.0305712
BP	carbohydrate derivative catabolic process	8	0.227892	0.0306505
BP	developmental maturation	10	0.228638	0.0310882
BP	response to X-ray	3	0.228638	0.031249
BP	photoreceptor cell maintenance	3	0.228638	0.031249
BP	embryonic eye morphogenesis	3	0.228638	0.031249
BP	mesodermal cell differentiation	3	0.228638	0.031249
BP	regulation of neutrophil chemotaxis	3	0.228638	0.031249
BP	regulation of phospholipase C activity	3	0.228638	0.031249
BP	negative regulation of cell morphogenesis involved in differentiation	5	0.228861	0.0313509
BP	xenobiotic metabolic process	6	0.230654	0.0316683
BP	cellular response to nutrient	4	0.233502	0.0322047
BP	axoneme assembly	4	0.233502	0.0322047
BP	striated muscle tissue development	13	0.234826	0.0326111
BP	molting cycle process	5	0.234826	0.0326797
BP	hair cycle process	5	0.234826	0.0326797
BP	skin epidermis development	5	0.234826	0.0326797
BP	calcium ion transport	14	0.23607	0.0329263
BP	cytosolic calcium ion transport	7	0.237112	0.0332092
BP	regulation of actin filament-based process	13	0.237112	0.0332193
BP	camera-type eye development	11	0.238283	0.0334719
BP	heart valve morphogenesis	3	0.238283	0.0336059
BP	response to interleukin-6	3	0.238283	0.0336059
BP	positive regulation of cation transmembrane transport	6	0.238999	0.0339387
BP	regulation of neuron projection development	15	0.238999	0.0340635
BP	regulation of extrinsic apoptotic signaling pathway	7	0.238999	0.0342174
BP	flavonoid metabolic process	2	0.238999	0.0343766
BP	regulation of extracellular matrix disassembly	2	0.238999	0.0343766
BP	NAD biosynthesis via nicotinamide riboside salvage pathway	2	0.238999	0.0343766
BP	heart trabecula formation	2	0.238999	0.0343766
BP	nephron tubule epithelial cell differentiation	2	0.238999	0.0343766
BP	positive regulation of mitochondrial fission	2	0.238999	0.0343766
BP	skin development	14	0.240655	0.0346897
BP	establishment of cell polarity	6	0.24254	0.0351124
BP	odontogenesis	6	0.24254	0.0351124
BP	regulation of cartilage development	4	0.245157	0.0356662
BP	endothelial cell migration	9	0.245157	0.0357203
BP	regulation of calcium ion transport	9	0.245157	0.0357203
BP	regulation of interleukin-1 beta secretion	3	0.245862	0.0360526
BP	dopaminergic neuron differentiation	3	0.245862	0.0360526
BP	regulation of intrinsic apoptotic signaling pathway in response to DNA damage	3	0.245862	0.0360526
BP	positive regulation of cell growth	7	0.246986	0.0362944
BP	peptidyl-tyrosine phosphorylation	13	0.247069	0.0363834
BP	embryonic skeletal system morphogenesis	5	0.249876	0.0368746
BP	second-messenger-mediated signaling	12	0.251992	0.0372654
BP	homophilic cell adhesion via plasma membrane adhesion molecules	7	0.252125	0.0373634
BP	positive regulation of epithelial cell differentiation	4	0.252344	0.0374746
BP	cellular calcium ion homeostasis	14	0.253862	0.037779
BP	regulation of calcium ion transport into cytosol	5	0.254779	0.038343
BP	negative regulation of intrinsic apoptotic signaling pathway	5	0.254779	0.038343
BP	peptidyl-tyrosine modification	13	0.254779	0.0383822
BP	regulation of glycoprotein biosynthetic process	3	0.254779	0.0385884
BP	regulation of collagen metabolic process	3	0.254779	0.0385884
BP	regulation of neutrophil migration	3	0.254779	0.0385884
BP	hair follicle maturation	2	0.254779	0.0387849
BP	retina vasculature development in camera-type eye	2	0.254779	0.0387849
BP	metanephric glomerulus development	2	0.254779	0.0387849
BP	regulation of vascular endothelial growth factor signaling pathway	2	0.254779	0.0387849
BP	divalent inorganic cation transport	15	0.254779	0.038788
BP	cellular iron ion homeostasis	4	0.256795	0.0393347
BP	embryonic digit morphogenesis	4	0.256795	0.0393347
BP	cranial skeletal system development	4	0.256795	0.0393347
BP	negative regulation of inflammatory response	6	0.261046	0.0400672
BP	amino sugar metabolic process	3	0.264969	0.0412127
BP	myoblast fusion	3	0.264969	0.0412127
BP	regulation of macrophage activation	3	0.264969	0.0412127
BP	ventricular septum morphogenesis	3	0.264969	0.0412127
BP	somitogenesis	4	0.264969	0.0412467
BP	secondary metabolic process	4	0.264969	0.0412467
BP	interleukin-1 beta production	4	0.264969	0.0412467
BP	neurotransmitter biosynthetic process	5	0.265332	0.0413859
BP	regulation of protein secretion	14	0.267075	0.0417408
BP	negative regulation of cell migration	10	0.269081	0.0422135
BP	embryonic limb morphogenesis	6	0.269081	0.0427025
BP	embryonic appendage morphogenesis	6	0.269081	0.0427025
BP	positive regulation of endothelial cell proliferation	5	0.269081	0.0429605
BP	cellular response to acid chemical	8	0.269081	0.043011
BP	cellular response to ionizing radiation	4	0.269081	0.0432106
BP	regulation of antigen processing and presentation	2	0.269081	0.0433948
BP	negative regulation of platelet-derived growth factor receptor signaling pathway	2	0.269081	0.0433948
BP	negative regulation of myotube differentiation	2	0.269081	0.0433948
BP	establishment of apical/basal cell polarity	2	0.269081	0.0433948
BP	inner dynein arm assembly	2	0.269081	0.0433948
BP	post-anal tail morphogenesis	2	0.269081	0.0433948
BP	melanin biosynthetic process	2	0.269081	0.0433948
BP	morphogenesis of an epithelial bud	2	0.269081	0.0433948
BP	positive regulation of monocyte chemotaxis	2	0.269081	0.0433948
BP	regulation of cellular response to vascular endothelial growth factor stimulus	2	0.269081	0.0433948
BP	cell fate determination	3	0.269688	0.0439246
BP	heart valve development	3	0.269688	0.0439246
BP	keratinocyte proliferation	3	0.269688	0.0439246
BP	positive regulation of kidney development	3	0.269688	0.0439246
BP	protein autophosphorylation	9	0.269688	0.0439617
BP	epithelial tube formation	6	0.269688	0.04406
BP	muscle cell proliferation	8	0.269688	0.0440803
BP	regulation of heart contraction	9	0.274298	0.0449498
BP	leukocyte chemotaxis	8	0.274298	0.045167
BP	myofibril assembly	4	0.274298	0.0452262
BP	cardiac septum morphogenesis	4	0.274298	0.0452262
BP	calcium ion homeostasis	14	0.274298	0.0452608
BP	regulation of cell morphogenesis involved in differentiation	10	0.281012	0.0467729
BP	positive regulation of protein secretion	9	0.281012	0.0469704
BP	positive regulation of cell projection organization	12	0.281012	0.0472421
BP	bone mineralization	5	0.281012	0.0478986
BP	membrane depolarization	5	0.281012	0.0478986
BP	regulation of systemic arterial blood pressure by circulatory renin-angiotensin	2	0.281012	0.0481967
BP	cAMP catabolic process	2	0.281012	0.0481967
BP	melanin metabolic process	2	0.281012	0.0481967
BP	glucocorticoid biosynthetic process	2	0.281012	0.0481967
BP	positive regulation of transcription of Notch receptor target	2	0.281012	0.0481967
BP	female genitalia development	2	0.281012	0.0481967
BP	polarized epithelial cell differentiation	2	0.281012	0.0481967
BP	outer dynein arm assembly	2	0.281012	0.0481967
BP	synapse maturation	2	0.281012	0.0481967
BP	camera-type eye photoreceptor cell differentiation	2	0.281012	0.0481967
BP	cell migration involved in heart development	2	0.281012	0.0481967
BP	positive regulation of dendritic spine morphogenesis	2	0.281012	0.0481967
BP	renal filtration cell differentiation	2	0.281012	0.0481967
BP	glomerular visceral epithelial cell differentiation	2	0.281012	0.0481967
BP	regulation of epithelial cell differentiation involved in kidney development	2	0.281012	0.0481967
BP	biomineral tissue development	6	0.281012	0.0482935
BP	regulation of smooth muscle cell proliferation	6	0.281012	0.0482935
BP	epithelial tube morphogenesis	11	0.28251	0.0486388
BP	regulation of cell growth	13	0.282628	0.0487472
BP	signal transduction in absence of ligand	4	0.284944	0.0494128
BP	negative regulation of wound healing	4	0.284944	0.0494128
BP	extrinsic apoptotic signaling pathway in absence of ligand	4	0.284944	0.0494128
BP	regulation of gastrulation	3	0.285045	0.0496078
BP	regulation of cAMP-mediated signaling	3	0.285045	0.0496078
BP	positive regulation of ion transmembrane transport	6	0.285401	0.0497585
BP	regulation of cyclic nucleotide metabolic process	5	0.293769	0.0513697
BP	hormone transport	11	0.293769	0.0514004
BP	negative regulation of cell growth	7	0.295534	0.0518237
BP	ovulation cycle process	3	0.295534	0.0525773
BP	interleukin-1 beta secretion	3	0.295534	0.0525773
BP	positive regulation of response to external stimulus	10	0.295534	0.0526692
BP	smooth muscle cell proliferation	6	0.295534	0.0527699
BP	cAMP metabolic process	5	0.295534	0.0531591
BP	negative regulation of chondrocyte differentiation	2	0.295534	0.0531813
BP	integrin activation	2	0.295534	0.0531813
BP	negative regulation of fibroblast growth factor receptor signaling pathway	2	0.295534	0.0531813
BP	regulation of mitochondrial depolarization	2	0.295534	0.0531813
BP	cellular glucuronidation	2	0.295534	0.0531813
BP	angiogenesis involved in wound healing	2	0.295534	0.0531813
BP	establishment of monopolar cell polarity	2	0.295534	0.0531813
BP	cell proliferation involved in kidney development	2	0.295534	0.0531813
BP	glomerular epithelial cell differentiation	2	0.295534	0.0531813
BP	regulation of tumor necrosis factor secretion	2	0.295534	0.0531813
BP	protein kinase B signaling	9	0.29619	0.0533917
BP	regulation of chemokine production	4	0.297972	0.0538056
BP	morphogenesis of a polarized epithelium	6	0.299766	0.0543163
BP	retina development in camera-type eye	6	0.299766	0.0543163
BP	regulation of endocrine process	3	0.305816	0.0556305
BP	regulation of CD4-positive, alpha-beta T cell activation	3	0.305816	0.0556305
BP	neurotransmitter metabolic process	6	0.305816	0.05589
BP	cellular response to lipopolysaccharide	7	0.305816	0.0559202
BP	myeloid leukocyte migration	7	0.305816	0.0559202
BP	cardiac ventricle morphogenesis	4	0.305816	0.0560789
BP	calcium ion import	4	0.305816	0.0560789
BP	regulation of protein kinase B signaling	8	0.310243	0.0570066
BP	cellular response to xenobiotic stimulus	7	0.310243	0.0573292
BP	regulation of organ morphogenesis	9	0.310243	0.0579766
BP	cartilage condensation	2	0.310243	0.0583395
BP	regulation of macrophage differentiation	2	0.310243	0.0583395
BP	decidualization	2	0.310243	0.0583395
BP	regulation of hair follicle development	2	0.310243	0.0583395
BP	establishment or maintenance of monopolar cell polarity	2	0.310243	0.0583395
BP	cellular response to vitamin D	2	0.310243	0.0583395
BP	atrial cardiac muscle cell action potential	2	0.310243	0.0583395
BP	atrial cardiac muscle cell to AV node cell signaling	2	0.310243	0.0583395
BP	atrial cardiac muscle cell to AV node cell communication	2	0.310243	0.0583395
BP	regulation of myoblast fusion	2	0.310243	0.0583395
BP	tumor necrosis factor secretion	2	0.310243	0.0583395
BP	regulation of bicellular tight junction assembly	2	0.310243	0.0583395
BP	regulation of glycoprotein metabolic process	3	0.311997	0.0587665
BP	kidney epithelium development	6	0.31232	0.0591191
BP	regulation of calcium ion transmembrane transport	6	0.31232	0.0591191
BP	regulation of reproductive process	6	0.31232	0.0591191
BP	response to lipopolysaccharide	11	0.312635	0.059276
BP	appendage development	7	0.316536	0.0602129
BP	limb development	7	0.316536	0.0602129
BP	regulation of actin cytoskeleton organization	11	0.316547	0.0603135
BP	glycosaminoglycan biosynthetic process	5	0.31741	0.0606755
BP	actin-mediated cell contraction	5	0.31741	0.0606755
BP	negative regulation of angiogenesis	6	0.317412	0.0607746
BP	regulation of membrane depolarization	3	0.320509	0.061984
BP	genitalia development	3	0.320509	0.061984
BP	mammary gland morphogenesis	3	0.320509	0.061984
BP	coronary vasculature development	3	0.320509	0.061984
BP	positive regulation of cell morphogenesis involved in differentiation	6	0.320509	0.0624575
BP	cellular response to fibroblast growth factor stimulus	6	0.320509	0.0624575
BP	embryonic heart tube development	4	0.320509	0.0632041
BP	regulation of biomineral tissue development	4	0.320509	0.0632041
BP	phosphate ion transport	2	0.320509	0.0636627
BP	cyclic nucleotide catabolic process	2	0.320509	0.0636627
BP	catechol-containing compound biosynthetic process	2	0.320509	0.0636627
BP	regulation of interleukin-13 production	2	0.320509	0.0636627
BP	embryonic hemopoiesis	2	0.320509	0.0636627
BP	steroid hormone secretion	2	0.320509	0.0636627
BP	catecholamine biosynthetic process	2	0.320509	0.0636627
BP	positive regulation of cAMP-mediated signaling	2	0.320509	0.0636627
BP	smooth muscle tissue development	2	0.320509	0.0636627
BP	cardiac myofibril assembly	2	0.320509	0.0636627
BP	response to hyperoxia	2	0.320509	0.0636627
BP	definitive hemopoiesis	2	0.320509	0.0636627
BP	left/right pattern formation	2	0.320509	0.0636627
BP	positive regulation of mononuclear cell migration	2	0.320509	0.0636627
BP	cell aggregation	2	0.320509	0.0636627
BP	negative regulation of epithelial cell proliferation	6	0.322546	0.0641677
BP	terpenoid metabolic process	5	0.322592	0.0646486
BP	response to amino acid	5	0.322592	0.0646486
BP	transforming growth factor beta receptor signaling pathway	7	0.322592	0.0647028
BP	regulation of peptide secretion	14	0.322592	0.0650702
BP	positive regulation of epithelial to mesenchymal transition	3	0.322592	0.0652818
BP	calcium-dependent cell-cell adhesion via plasma membrane cell adhesion molecules	3	0.322592	0.0652818
BP	negative regulation of fat cell differentiation	3	0.322592	0.0652818
BP	icosanoid biosynthetic process	3	0.322592	0.0652818
BP	negative regulation of peptidyl-tyrosine phosphorylation	3	0.322592	0.0652818
BP	endocrine hormone secretion	3	0.322592	0.0652818
BP	regulation of granulocyte chemotaxis	3	0.322592	0.0652818
BP	vasculogenesis	4	0.323565	0.06568
BP	mononuclear cell migration	4	0.323565	0.06568
BP	tube formation	6	0.323682	0.0659053
BP	negative regulation of blood vessel morphogenesis	6	0.323682	0.0659053
BP	Wnt signaling pathway, planar cell polarity pathway	5	0.327029	0.0666887
BP	divalent metal ion transport	14	0.327297	0.0669471
BP	cellular divalent inorganic cation homeostasis	14	0.327297	0.0669471
BP	cellular response to molecule of bacterial origin	7	0.328832	0.067806
BP	neural crest cell differentiation	4	0.328832	0.0682058
BP	regulation of blood coagulation	4	0.328832	0.0682058
BP	regulation of receptor-mediated endocytosis	4	0.328832	0.0682058
BP	regulation of hemostasis	4	0.328832	0.0682058
BP	acute-phase response	3	0.328832	0.0686586
BP	molting cycle	5	0.328832	0.0687644
BP	hair cycle	5	0.328832	0.0687644
BP	multicellular organismal homeostasis	11	0.328832	0.0690445
BP	prostaglandin biosynthetic process	2	0.328832	0.0691422
BP	endochondral bone growth	2	0.328832	0.0691422
BP	prostanoid biosynthetic process	2	0.328832	0.0691422
BP	mitochondrial depolarization	2	0.328832	0.0691422
BP	hematopoietic stem cell proliferation	2	0.328832	0.0691422
BP	glomerular epithelium development	2	0.328832	0.0691422
BP	regulation of monocyte chemotaxis	2	0.328832	0.0691422
BP	regulation of lymphocyte chemotaxis	2	0.328832	0.0691422
BP	positive regulation of growth	9	0.328832	0.0691993
BP	extrinsic apoptotic signaling pathway	8	0.328832	0.0692062
BP	regulation of endothelial cell proliferation	6	0.329561	0.0694624
BP	chemokine production	4	0.335276	0.0707813
BP	regulation of establishment of planar polarity	5	0.335276	0.0708755
BP	negative regulation of defense response	7	0.335358	0.0709973
BP	positive regulation of epithelial cell migration	6	0.336208	0.0712819
BP	positive regulation of peptide secretion	9	0.337158	0.0718655
BP	embryo implantation	3	0.337158	0.0721133
BP	positive regulation of phospholipase activity	3	0.337158	0.0721133
BP	membrane depolarization during action potential	3	0.337158	0.0721133
BP	negative regulation of leukocyte apoptotic process	3	0.337158	0.0721133
BP	regulation of lymphocyte migration	3	0.337158	0.0721133
BP	aminoglycan biosynthetic process	5	0.340855	0.073022
BP	morphogenesis of embryonic epithelium	6	0.340855	0.0731286
BP	positive regulation of neuron projection development	9	0.340855	0.0732222
BP	regulation of epithelial cell proliferation	11	0.34123	0.0737004
BP	actomyosin structure organization	7	0.34123	0.0742767
BP	dendritic cell chemotaxis	2	0.34123	0.07477
BP	regulation of cellular extravasation	2	0.34123	0.07477
BP	vitamin biosynthetic process	2	0.34123	0.07477
BP	regulation of platelet-derived growth factor receptor signaling pathway	2	0.34123	0.07477
BP	negative regulation of steroid biosynthetic process	2	0.34123	0.07477
BP	interleukin-13 production	2	0.34123	0.07477
BP	tooth mineralization	2	0.34123	0.07477
BP	vitamin D metabolic process	2	0.34123	0.07477
BP	membrane depolarization during cardiac muscle cell action potential	2	0.34123	0.07477
BP	regulation of mitochondrial fission	2	0.34123	0.07477
BP	regulation of execution phase of apoptosis	2	0.34123	0.07477
BP	appendage morphogenesis	6	0.34123	0.0750026
BP	limb morphogenesis	6	0.34123	0.0750026
BP	response to fibroblast growth factor	6	0.34123	0.0750026
BP	anion homeostasis	3	0.341729	0.0756443
BP	endochondral bone morphogenesis	3	0.341729	0.0756443
BP	replacement bone morphogenesis	3	0.341729	0.0756443
BP	positive regulation of sprouting angiogenesis	3	0.341729	0.0756443
BP	positive regulation of extrinsic apoptotic signaling pathway	3	0.341729	0.0756443
BP	positive regulation of axonogenesis	4	0.342831	0.0760795
BP	blood coagulation	11	0.342831	0.0761016
BP	response to interferon-gamma	7	0.34929	0.0776442
BP	positive regulation of neuron differentiation	11	0.351002	0.0785518
BP	hormone biosynthetic process	4	0.351002	0.0788015
BP	regulation of coagulation	4	0.351002	0.0788015
BP	negative regulation of vasculature development	6	0.351002	0.078832
BP	negative regulation of JAK-STAT cascade	3	0.351002	0.0792503
BP	protein trimerization	3	0.351002	0.0792503
BP	negative regulation of STAT cascade	3	0.351002	0.0792503
BP	regulation of endothelial cell migration	7	0.351002	0.0793609
BP	positive regulation of epithelial cell proliferation	7	0.351002	0.0793609
BP	response to molecule of bacterial origin	11	0.351002	0.0797953
BP	renal system process involved in regulation of systemic arterial blood pressure	2	0.351002	0.0805381
BP	atrioventricular valve development	2	0.351002	0.0805381
BP	uronic acid metabolic process	2	0.351002	0.0805381
BP	positive regulation of collagen metabolic process	2	0.351002	0.0805381
BP	regulation of cardiac muscle contraction by calcium ion signaling	2	0.351002	0.0805381
BP	glucuronate metabolic process	2	0.351002	0.0805381
BP	ovulation	2	0.351002	0.0805381
BP	membrane protein intracellular domain proteolysis	2	0.351002	0.0805381
BP	microvillus organization	2	0.351002	0.0805381
BP	regulation of establishment or maintenance of cell polarity	2	0.351002	0.0805381
BP	positive regulation of collagen biosynthetic process	2	0.351002	0.0805381
BP	bone growth	2	0.351002	0.0805381
BP	glucosamine-containing compound metabolic process	2	0.351002	0.0805381
BP	neuron projection extension	6	0.351611	0.0807873
BP	coagulation	11	0.352282	0.0810511
BP	extrinsic apoptotic signaling pathway via death domain receptors	4	0.35311	0.0815716
BP	endocrine process	4	0.35311	0.0815716
BP	negative regulation of response to wounding	4	0.35311	0.0815716
BP	hemostasis	11	0.355867	0.0823192
BP	hormone secretion	10	0.355894	0.0824361
BP	syncytium formation by plasma membrane fusion	3	0.357065	0.0829299
BP	NAD biosynthetic process	3	0.357065	0.0829299
BP	cell growth	14	0.358016	0.0832622
BP	regulation of leukocyte apoptotic process	4	0.362377	0.0843892
BP	regulation of endocytosis	8	0.362394	0.0845059
BP	heart contraction	9	0.362507	0.0846451
BP	divalent inorganic cation homeostasis	14	0.364904	0.085466
BP	regulation of systemic arterial blood pressure by renin-angiotensin	2	0.364904	0.0864389
BP	glucocorticoid metabolic process	2	0.364904	0.0864389
BP	negative regulation of cardiac muscle cell apoptotic process	2	0.364904	0.0864389
BP	negative regulation of steroid metabolic process	2	0.364904	0.0864389
BP	positive regulation of positive chemotaxis	2	0.364904	0.0864389
BP	negative regulation of cardiac muscle tissue growth	2	0.364904	0.0864389
BP	cartilage development involved in endochondral bone morphogenesis	2	0.364904	0.0864389
BP	negative regulation of heart growth	2	0.364904	0.0864389
BP	positive regulation of excitatory postsynaptic potential	2	0.364904	0.0864389
BP	gland morphogenesis	5	0.364904	0.086636
BP	forebrain neuron differentiation	3	0.364904	0.0866817
BP	cGMP metabolic process	3	0.364904	0.0866817
BP	muscle cell differentiation	11	0.367928	0.0875147
BP	epithelial cell proliferation	12	0.368248	0.0877054
BP	tissue migration	10	0.368985	0.0879958
BP	regulation of intrinsic apoptotic signaling pathway	6	0.37206	0.0888776
BP	anatomical structure homeostasis	12	0.37206	0.0889608
BP	heart process	9	0.372532	0.0891897
BP	neutrophil chemotaxis	4	0.376118	0.0901654
BP	syncytium formation	3	0.376553	0.0905041
BP	regulation of kidney development	3	0.376553	0.0905041
BP	endochondral ossification	2	0.378143	0.0924648
BP	positive regulation of transforming growth factor beta receptor signaling pathway	2	0.378143	0.0924648
BP	replacement ossification	2	0.378143	0.0924648
BP	neurotrophin TRK receptor signaling pathway	2	0.378143	0.0924648
BP	embryonic camera-type eye morphogenesis	2	0.378143	0.0924648
BP	positive regulation of interleukin-1 beta secretion	2	0.378143	0.0924648
BP	regulation of positive chemotaxis	2	0.378143	0.0924648
BP	regulation of syncytium formation by plasma membrane fusion	2	0.378143	0.0924648
BP	morphogenesis of an epithelial fold	2	0.378143	0.0924648
BP	prostate gland epithelium morphogenesis	2	0.378143	0.0924648
BP	regulation of androgen receptor signaling pathway	2	0.378143	0.0924648
BP	cell surface receptor signaling pathway involved in heart development	2	0.378143	0.0924648
BP	positive regulation of cellular response to transforming growth factor beta stimulus	2	0.378143	0.0924648
BP	platelet activation	6	0.378143	0.0930829
BP	glycosaminoglycan metabolic process	6	0.378143	0.0930829
BP	microtubule bundle formation	4	0.378143	0.0931229
BP	neural tube closure	4	0.378143	0.0931229
BP	positive regulation of nucleotide metabolic process	4	0.378143	0.0931229
BP	positive regulation of purine nucleotide metabolic process	4	0.378143	0.0931229
BP	establishment of planar polarity	5	0.379888	0.0939076
BP	embryonic epithelial tube formation	5	0.379888	0.0939076
BP	establishment of tissue polarity	5	0.379888	0.0939076
BP	regulation of morphogenesis of a branching structure	3	0.381382	0.0943957
BP	tube closure	4	0.387886	0.0961261
BP	endothelial cell proliferation	6	0.392017	0.0973939
BP	BMP signaling pathway	6	0.392017	0.0973939
BP	neuron projection regeneration	3	0.393944	0.098355
BP	hair follicle morphogenesis	2	0.393944	0.0986086
BP	rRNA methylation	2	0.393944	0.0986086
BP	dendritic cell migration	2	0.393944	0.0986086
BP	fibrinolysis	2	0.393944	0.0986086
BP	secondary metabolite biosynthetic process	2	0.393944	0.0986086
BP	metanephros development	4	0.395221	0.0991743
BP	regulation of systemic arterial blood pressure	4	0.395221	0.0991743
BP	positive regulation of ion transport	8	0.397403	0.0998456
BP	fatty acid derivative biosynthetic process	4	0.405982	0.102267
BP	positive regulation of actin filament bundle assembly	3	0.405982	0.10238
BP	photoreceptor cell differentiation	3	0.405982	0.10238
BP	positive regulation of secretion by cell	11	0.407218	0.102819
BP	Rho protein signal transduction	7	0.408269	0.103662
BP	positive regulation of mesenchymal cell proliferation	2	0.408269	0.104864
BP	negative regulation of striated muscle cell apoptotic process	2	0.408269	0.104864
BP	negative regulation of epithelial to mesenchymal transition	2	0.408269	0.104864
BP	regulation of cGMP metabolic process	2	0.408269	0.104864
BP	mammary gland epithelial cell proliferation	2	0.408269	0.104864
BP	response to increased oxygen levels	2	0.408269	0.104864
BP	regulation of hair cycle	2	0.408269	0.104864
BP	regulation of B cell differentiation	2	0.408269	0.104864
BP	response to pain	2	0.408269	0.104864
BP	prostate gland morphogenesis	2	0.408269	0.104864
BP	regulation of transforming growth factor beta production	2	0.408269	0.104864
BP	interleukin-8 secretion	2	0.408269	0.104864
BP	establishment of epithelial cell polarity	2	0.408269	0.104864
BP	negative regulation of endopeptidase activity	8	0.40938	0.105286
BP	positive regulation of plasma membrane bounded cell projection assembly	4	0.40938	0.105404
BP	regulation of phospholipase activity	3	0.412524	0.10647
BP	regulation of myotube differentiation	3	0.412524	0.10647
BP	determination of bilateral symmetry	5	0.412897	0.106695
BP	regulation of blood circulation	9	0.413829	0.107065
BP	cellular response to biotic stimulus	7	0.415872	0.107723
BP	negative regulation of cell projection organization	6	0.417856	0.108627
BP	organ growth	6	0.417856	0.108627
BP	cell maturation	6	0.417856	0.108627
BP	isoprenoid metabolic process	5	0.419634	0.10935
BP	specification of symmetry	5	0.419634	0.10935
BP	establishment or maintenance of cell polarity	7	0.419797	0.109785
BP	heart looping	3	0.419797	0.110623
BP	peptide cross-linking	3	0.419797	0.110623
BP	primary alcohol metabolic process	3	0.419797	0.110623
BP	regulation of extrinsic apoptotic signaling pathway via death domain receptors	3	0.419797	0.110623
BP	positive regulation of peptidyl-threonine phosphorylation	2	0.419797	0.111223
BP	positive regulation of histone acetylation	2	0.419797	0.111223
BP	positive regulation of insulin secretion involved in cellular response to glucose stimulus	2	0.419797	0.111223
BP	regulation of meiotic nuclear division	2	0.419797	0.111223
BP	positive regulation of synaptic transmission, glutamatergic	2	0.419797	0.111223
BP	regulation of neuron projection regeneration	2	0.419797	0.111223
BP	transforming growth factor beta production	2	0.419797	0.111223
BP	negative regulation of signal transduction by p53 class mediator	2	0.419797	0.111223
BP	positive regulation of epithelial cell apoptotic process	2	0.419797	0.111223
BP	developmental cell growth	7	0.421737	0.111868
BP	lung development	6	0.425138	0.1133
BP	regulation of JNK cascade	6	0.425138	0.1133
BP	regulation of axonogenesis	6	0.425138	0.1133
BP	cellular response to interferon-gamma	6	0.425138	0.1133
BP	mesoderm development	5	0.428783	0.114757
BP	organic hydroxy compound metabolic process	14	0.428783	0.114795
BP	neural retina development	3	0.428783	0.114838
BP	cardiac muscle cell contraction	3	0.428783	0.114838
BP	primary neural tube formation	4	0.428783	0.115072
BP	segmentation	4	0.428783	0.115072
BP	cellular response to interleukin-1	6	0.430526	0.115674
BP	actin filament-based movement	5	0.433471	0.117508
BP	regulation of type 2 immune response	2	0.433471	0.11768
BP	regulation of keratinocyte proliferation	2	0.433471	0.11768
BP	negative regulation of interferon-gamma production	2	0.433471	0.11768
BP	regulation of DNA damage response, signal transduction by p53 class mediator	2	0.433471	0.11768
BP	epidermis morphogenesis	2	0.433471	0.11768
BP	positive regulation of filopodium assembly	2	0.433471	0.11768
BP	positive regulation of cell migration involved in sprouting angiogenesis	2	0.433471	0.11768
BP	positive regulation of peptidyl-lysine acetylation	2	0.433471	0.11768
BP	phenol-containing compound metabolic process	4	0.435546	0.118378
BP	axon guidance	8	0.435881	0.118605
BP	response to mechanical stimulus	7	0.442	0.120408
BP	regulation of heart rate	4	0.44582	0.121726
BP	female gonad development	4	0.44582	0.121726
BP	neuron projection guidance	8	0.448396	0.122569
BP	central nervous system neuron differentiation	6	0.448748	0.122945
BP	respiratory tube development	6	0.448748	0.122945
BP	negative regulation of axonogenesis	3	0.449347	0.123444
BP	positive regulation of lipase activity	3	0.449347	0.123444
BP	maternal placenta development	2	0.449347	0.124228
BP	cardiac atrium morphogenesis	2	0.449347	0.124228
BP	regulation of cell fate commitment	2	0.449347	0.124228
BP	positive regulation of smoothened signaling pathway	2	0.449347	0.124228
BP	negative regulation of B cell activation	2	0.449347	0.124228
BP	regulation of extracellular matrix organization	2	0.449347	0.124228
BP	positive regulation of cell-cell adhesion	8	0.449514	0.124577
BP	regulation of actin filament organization	8	0.449514	0.124577
BP	negative regulation of apoptotic signaling pathway	7	0.449514	0.124801
BP	diterpenoid metabolic process	4	0.449514	0.125114
BP	response to cAMP	4	0.449514	0.125114
BP	neutrophil migration	4	0.449514	0.125114
BP	negative regulation of peptidase activity	8	0.454353	0.126602
BP	positive regulation of nuclear division	3	0.458258	0.127833
BP	negative regulation of intracellular steroid hormone receptor signaling pathway	2	0.466513	0.130862
BP	mammary gland duct morphogenesis	2	0.466513	0.130862
BP	cellular response to interleukin-6	2	0.466513	0.130862
BP	cell-cell signaling involved in cardiac conduction	2	0.466513	0.130862
BP	regulation of blood vessel endothelial cell proliferation involved in sprouting angiogenesis	2	0.466513	0.130862
BP	forebrain generation of neurons	3	0.468954	0.132277
BP	macrophage activation	3	0.468954	0.132277
BP	ovulation cycle	3	0.468954	0.132277
BP	determination of heart left/right asymmetry	3	0.468954	0.132277
BP	positive regulation of DNA biosynthetic process	3	0.468954	0.132277
BP	regulation of apoptotic signaling pathway	11	0.470036	0.132728
BP	positive regulation of developmental growth	6	0.470409	0.13298
BP	regulation of extent of cell growth	4	0.477334	0.135512
BP	regulation of blood pressure	6	0.477334	0.135548
BP	regulation of cell-cell adhesion	11	0.477334	0.136127
BP	glycoprotein biosynthetic process	10	0.477334	0.136687
BP	embryonic heart tube morphogenesis	3	0.477334	0.136774
BP	regulation of cardiac muscle tissue growth	3	0.477334	0.136774
BP	branching involved in blood vessel morphogenesis	2	0.477334	0.137575
BP	negative regulation of cell-matrix adhesion	2	0.477334	0.137575
BP	purine ribonucleotide catabolic process	2	0.477334	0.137575
BP	regulation of hormone metabolic process	2	0.477334	0.137575
BP	regulation of fibroblast growth factor receptor signaling pathway	2	0.477334	0.137575
BP	regulation of vascular permeability	2	0.477334	0.137575
BP	peptide catabolic process	2	0.477334	0.137575
BP	negative regulation of JNK cascade	2	0.477334	0.137575
BP	negative regulation of organ growth	2	0.477334	0.137575
BP	axon extension involved in axon guidance	2	0.477334	0.137575
BP	neuron projection extension involved in neuron projection guidance	2	0.477334	0.137575
BP	negative regulation of neuron projection development	5	0.477334	0.137612
BP	development of primary female sexual characteristics	4	0.481814	0.139054
BP	regulation of G-protein coupled receptor protein signaling pathway	5	0.486302	0.140602
BP	carbohydrate homeostasis	7	0.486302	0.140804
BP	glucose homeostasis	7	0.486302	0.140804
BP	negative regulation of neurogenesis	8	0.487048	0.141254
BP	regulation of smooth muscle cell migration	3	0.487048	0.141323
BP	epithelial cell migration	9	0.489463	0.142316
BP	mesonephros development	4	0.489463	0.142633
BP	neural tube formation	4	0.489463	0.142633
BP	leukocyte apoptotic process	4	0.489463	0.142633
BP	long-term memory	2	0.490159	0.144362
BP	ribonucleotide catabolic process	2	0.490159	0.144362
BP	peptidyl-glutamic acid modification	2	0.490159	0.144362
BP	regulation of collagen biosynthetic process	2	0.490159	0.144362
BP	positive regulation of dendrite morphogenesis	2	0.490159	0.144362
BP	heart trabecula morphogenesis	2	0.490159	0.144362
BP	regulation of T cell apoptotic process	2	0.490159	0.144362
BP	regulation of calcium ion import	2	0.490159	0.144362
BP	negative regulation of signal transduction in absence of ligand	2	0.490159	0.144362
BP	negative regulation of extrinsic apoptotic signaling pathway in absence of ligand	2	0.490159	0.144362
BP	nitric oxide biosynthetic process	3	0.492772	0.145922
BP	regulation of bone mineralization	3	0.492772	0.145922
BP	androgen receptor signaling pathway	3	0.492772	0.145922
BP	neuron fate commitment	3	0.492772	0.145922
BP	inorganic anion transport	6	0.492772	0.146052
BP	granulocyte chemotaxis	4	0.492772	0.146248
BP	negative regulation of extrinsic apoptotic signaling pathway	4	0.492772	0.146248
BP	positive regulation of secretion	11	0.492772	0.146603
BP	transition metal ion homeostasis	5	0.492772	0.146666
BP	cardiac conduction	5	0.492772	0.146666
BP	calcium ion transmembrane transport	9	0.497454	0.148369
BP	epithelium migration	9	0.497454	0.148369
BP	smooth muscle contraction	4	0.500216	0.149899
BP	cell aging	4	0.500216	0.149899
BP	response to retinoic acid	4	0.500216	0.149899
BP	anion transmembrane transport	8	0.500216	0.14999
BP	regulation of muscle cell apoptotic process	3	0.500216	0.150569
BP	positive regulation of insulin secretion	3	0.500216	0.150569
BP	positive regulation of JUN kinase activity	3	0.500216	0.150569
BP	cardiac atrium development	2	0.500216	0.151217
BP	prostanoid metabolic process	2	0.500216	0.151217
BP	prostaglandin metabolic process	2	0.500216	0.151217
BP	positive regulation of interleukin-1 beta production	2	0.500216	0.151217
BP	cell fate commitment involved in formation of primary germ layer	2	0.500216	0.151217
BP	regulation of actin cytoskeleton reorganization	2	0.500216	0.151217
BP	regulation of neurotransmitter levels	9	0.503857	0.152475
BP	neuron migration	5	0.504543	0.152839
BP	signal release	12	0.505619	0.153323
BP	response to ketone	6	0.507881	0.154167
BP	pigment metabolic process	3	0.510447	0.155264
BP	negative regulation of response to DNA damage stimulus	3	0.510447	0.155264
BP	positive regulation of transmembrane transport	6	0.512028	0.156915
BP	regulation of sprouting angiogenesis	4	0.512028	0.157303
BP	positive regulation of cytokine production involved in immune response	2	0.512028	0.158136
BP	activation of JUN kinase activity	2	0.512028	0.158136
BP	regulation of mesenchymal cell proliferation	2	0.512028	0.158136
BP	positive regulation of smooth muscle cell migration	2	0.512028	0.158136
BP	peptide hormone processing	2	0.512028	0.158136
BP	protein localization to synapse	2	0.512028	0.158136
BP	regulation of CD4-positive, alpha-beta T cell differentiation	2	0.512028	0.158136
BP	positive regulation of epidermis development	2	0.512028	0.158136
BP	negative chemotaxis	2	0.512028	0.158136
BP	positive regulation of telomerase activity	2	0.512028	0.158136
BP	negative regulation of cardiac muscle tissue development	2	0.512028	0.158136
BP	regulation of heart rate by cardiac conduction	2	0.512028	0.158136
BP	regulation of neuron migration	2	0.512028	0.158136
BP	organic acid transport	9	0.512945	0.158738
BP	carboxylic acid transport	9	0.512945	0.158738
BP	steroid biosynthetic process	6	0.51496	0.159685
BP	interleukin-8 production	3	0.51496	0.160003
BP	cardiac muscle cell development	3	0.51496	0.160003
BP	mammary gland epithelium development	3	0.51496	0.160003
BP	maintenance of location	9	0.522728	0.162982
BP	striated muscle cell differentiation	8	0.522728	0.163573
BP	NAD metabolic process	3	0.522728	0.164786
BP	nitric oxide metabolic process	3	0.522728	0.164786
BP	regulation of heart growth	3	0.522728	0.164786
BP	cellular component assembly involved in morphogenesis	4	0.522728	0.164841
BP	myotube differentiation	4	0.522728	0.164841
BP	regulation of transforming growth factor beta receptor signaling pathway	4	0.522728	0.164841
BP	neurotrophin signaling pathway	2	0.522728	0.165112
BP	type 2 immune response	2	0.522728	0.165112
BP	negative regulation of striated muscle cell differentiation	2	0.522728	0.165112
BP	regulation of dendritic spine morphogenesis	2	0.522728	0.165112
BP	regulation of cardiac muscle cell contraction	2	0.522728	0.165112
BP	positive regulation of protein acetylation	2	0.522728	0.165112
BP	bone development	6	0.522728	0.165289
BP	regulation of ion transmembrane transport	12	0.522728	0.165651
BP	nephron epithelium development	4	0.522728	0.168658
BP	stem cell proliferation	4	0.522728	0.168658
BP	negative regulation of cysteine-type endopeptidase activity	4	0.522728	0.168658
BP	regulation of cellular component size	10	0.522728	0.169514
BP	muscle cell apoptotic process	3	0.522728	0.169612
BP	CD4-positive, alpha-beta T cell activation	3	0.522728	0.169612
BP	positive regulation of T cell differentiation	3	0.522728	0.169612
BP	regulation of muscle system process	7	0.522728	0.170392
BP	response to alcohol	6	0.522728	0.170975
BP	anatomical structure maturation	5	0.522728	0.171989
BP	blood vessel endothelial cell proliferation involved in sprouting angiogenesis	2	0.522728	0.172141
BP	Wnt signaling pathway, calcium modulating pathway	2	0.522728	0.172141
BP	regulation of cardiac muscle cell apoptotic process	2	0.522728	0.172141
BP	embryonic camera-type eye development	2	0.522728	0.172141
BP	calcium ion-regulated exocytosis of neurotransmitter	2	0.522728	0.172141
BP	regulation of mononuclear cell migration	2	0.522728	0.172141
BP	modulation of excitatory postsynaptic potential	2	0.522728	0.172141
BP	negative regulation of extrinsic apoptotic signaling pathway via death domain receptors	2	0.522728	0.172141
BP	macrophage migration	2	0.522728	0.172141
BP	transition metal ion transport	4	0.522728	0.172505
BP	memory	4	0.522728	0.172505
BP	regulation of cellular response to transforming growth factor beta stimulus	4	0.522728	0.172505
BP	response to toxic substance	13	0.522728	0.172634
BP	myeloid leukocyte differentiation	6	0.522728	0.173848
BP	response to interleukin-1	6	0.522728	0.173848
BP	negative regulation of transforming growth factor beta receptor signaling pathway	3	0.522728	0.174477
BP	somatic stem cell population maintenance	3	0.522728	0.174477
BP	regulation of alpha-beta T cell activation	3	0.522728	0.174477
BP	regulation of cardiac conduction	3	0.522728	0.174477
BP	placenta development	5	0.522728	0.175267
BP	response to ionizing radiation	5	0.522728	0.175267
BP	axon extension	4	0.522728	0.176384
BP	positive regulation of nervous system development	13	0.522728	0.177914
BP	mitochondrial fission	2	0.522728	0.179218
BP	regulation of systemic arterial blood pressure by hormone	2	0.522728	0.179218
BP	muscle filament sliding	2	0.522728	0.179218
BP	macrophage differentiation	2	0.522728	0.179218
BP	negative regulation of actin filament depolymerization	2	0.522728	0.179218
BP	actin-myosin filament sliding	2	0.522728	0.179218
BP	regulation of endothelial cell differentiation	2	0.522728	0.179218
BP	positive regulation of axon extension	2	0.522728	0.179218
BP	establishment of endothelial barrier	2	0.522728	0.179218
BP	positive regulation of production of molecular mediator of immune response	3	0.522728	0.179382
BP	mesenchymal cell development	3	0.522728	0.179382
BP	smooth muscle cell migration	3	0.522728	0.179382
BP	regulation of ATPase activity	3	0.522728	0.179382
BP	reactive nitrogen species metabolic process	3	0.522728	0.179382
BP	desmosome organization	1	0.522728	0.180644
BP	Wnt signaling pathway involved in heart development	1	0.522728	0.180644
BP	regulation of cilium beat frequency	1	0.522728	0.180644
BP	receptor guanylyl cyclase signaling pathway	1	0.522728	0.180644
BP	forebrain neuron fate commitment	1	0.522728	0.180644
BP	lipid glycosylation	1	0.522728	0.180644
BP	transforming growth factor beta1 production	1	0.522728	0.180644
BP	regulation of transforming growth factor beta1 production	1	0.522728	0.180644
BP	positive regulation of T cell differentiation in thymus	1	0.522728	0.180644
BP	cortisol metabolic process	1	0.522728	0.180644
BP	cellular response to interferon-alpha	1	0.522728	0.180644
BP	endothelial cell activation	1	0.522728	0.180644
BP	negative regulation of protein import into nucleus	1	0.522728	0.180644
BP	retinal cone cell differentiation	1	0.522728	0.180644
BP	drinking behavior	1	0.522728	0.180644
BP	surfactant homeostasis	1	0.522728	0.180644
BP	negative regulation of endothelial cell differentiation	1	0.522728	0.180644
BP	regulation of T-helper 1 cell differentiation	1	0.522728	0.180644
BP	retinal cone cell development	1	0.522728	0.180644
BP	response to mercury ion	1	0.522728	0.180644
BP	determination of dorsal/ventral asymmetry	1	0.522728	0.180644
BP	paraxial mesoderm morphogenesis	1	0.522728	0.180644
BP	medium-chain fatty acid metabolic process	1	0.522728	0.180644
BP	negative regulation of fibrinolysis	1	0.522728	0.180644
BP	regulation of oocyte development	1	0.522728	0.180644
BP	regulation of atrial cardiac muscle cell membrane depolarization	1	0.522728	0.180644
BP	prostatic bud formation	1	0.522728	0.180644
BP	regulation of type B pancreatic cell proliferation	1	0.522728	0.180644
BP	proton-transporting V-type ATPase complex assembly	1	0.522728	0.180644
BP	vacuolar proton-transporting V-type ATPase complex assembly	1	0.522728	0.180644
BP	regulation of tooth mineralization	1	0.522728	0.180644
BP	fat cell proliferation	1	0.522728	0.180644
BP	regulation of fat cell proliferation	1	0.522728	0.180644
BP	chemokine (C-C motif) ligand 5 production	1	0.522728	0.180644
BP	cell proliferation involved in metanephros development	1	0.522728	0.180644
BP	pyrimidine-containing compound transmembrane transport	1	0.522728	0.180644
BP	fibroblast activation	1	0.522728	0.180644
BP	neurotransmitter-gated ion channel clustering	1	0.522728	0.180644
BP	SA node cell to atrial cardiac muscle cell communication	1	0.522728	0.180644
BP	glucosamine-containing compound catabolic process	1	0.522728	0.180644
BP	leukotriene D4 metabolic process	1	0.522728	0.180644
BP	leukotriene D4 biosynthetic process	1	0.522728	0.180644
BP	negative regulation of protein import	1	0.522728	0.180644
BP	negative regulation of leukocyte adhesion to vascular endothelial cell	1	0.522728	0.180644
BP	regulation of oogenesis	1	0.522728	0.180644
BP	regulation of mesoderm formation	1	0.522728	0.180644
BP	regulation of chemokine (C-X-C motif) ligand 2 production	1	0.522728	0.180644
BP	regulation of T-helper 2 cell cytokine production	1	0.522728	0.180644
BP	positive regulation of vasculogenesis	1	0.522728	0.180644
BP	respiratory system development	6	0.527872	0.182586
BP	phospholipase C-activating G-protein coupled receptor signaling pathway	4	0.530985	0.184228
BP	cardiac cell development	3	0.530985	0.184324
BP	regulation of cardiac muscle contraction	3	0.530985	0.184324
BP	negative regulation of cellular response to transforming growth factor beta stimulus	3	0.530985	0.184324
BP	negative regulation of nervous system development	8	0.532363	0.184968
BP	rRNA modification	2	0.534393	0.186339
BP	regulation of striated muscle cell apoptotic process	2	0.534393	0.186339
BP	cellular response to epidermal growth factor stimulus	2	0.534393	0.186339
BP	dendritic cell differentiation	2	0.534393	0.186339
BP	regulation of body fluid levels	13	0.535488	0.186887
BP	cellular transition metal ion homeostasis	4	0.538267	0.188192
BP	mucopolysaccharide metabolic process	4	0.538267	0.188192
BP	regulation of lymphocyte differentiation	5	0.538467	0.188616
BP	C-terminal protein lipidation	3	0.538467	0.189301
BP	regulation of calcium ion-dependent exocytosis	3	0.538467	0.189301
BP	regulation of cAMP metabolic process	3	0.538467	0.189301
BP	pancreas development	3	0.538467	0.189301
BP	positive regulation of cell development	13	0.538467	0.190536
BP	negative regulation of muscle cell apoptotic process	2	0.538467	0.193499
BP	cardiac muscle cell apoptotic process	2	0.538467	0.193499
BP	regulation of peptidyl-threonine phosphorylation	2	0.538467	0.193499
BP	negative regulation of epithelial cell differentiation	2	0.538467	0.193499
BP	photoreceptor cell development	2	0.538467	0.193499
BP	positive regulation of dendritic spine development	2	0.538467	0.193499
BP	metanephric nephron development	2	0.538467	0.193499
BP	multicellular organismal signaling	6	0.538467	0.194501
BP	regulation of glomerular filtration	1	0.538467	0.196812
BP	mitral valve development	1	0.538467	0.196812
BP	arginine catabolic process	1	0.538467	0.196812
BP	L-phenylalanine metabolic process	1	0.538467	0.196812
BP	L-phenylalanine catabolic process	1	0.538467	0.196812
BP	creatine metabolic process	1	0.538467	0.196812
BP	glutathione catabolic process	1	0.538467	0.196812
BP	midgut development	1	0.538467	0.196812
BP	positive regulation of T cell chemotaxis	1	0.538467	0.196812
BP	gap junction assembly	1	0.538467	0.196812
BP	peptidyl-glutamic acid carboxylation	1	0.538467	0.196812
BP	protein carboxylation	1	0.538467	0.196812
BP	poly-N-acetyllactosamine metabolic process	1	0.538467	0.196812
BP	regulation of gonadotropin secretion	1	0.538467	0.196812
BP	negative regulation of multicellular organism growth	1	0.538467	0.196812
BP	positive regulation of vascular permeability	1	0.538467	0.196812
BP	regulation of transcription from RNA polymerase II promoter in response to oxidative stress	1	0.538467	0.196812
BP	regulation of chemokine biosynthetic process	1	0.538467	0.196812
BP	cellular ketone body metabolic process	1	0.538467	0.196812
BP	enteric nervous system development	1	0.538467	0.196812
BP	positive regulation of immunoglobulin secretion	1	0.538467	0.196812
BP	anatomical structure regression	1	0.538467	0.196812
BP	positive regulation of type I interferon-mediated signaling pathway	1	0.538467	0.196812
BP	cardiac muscle cell myoblast differentiation	1	0.538467	0.196812
BP	prostate glandular acinus development	1	0.538467	0.196812
BP	establishment of blood-brain barrier	1	0.538467	0.196812
BP	positive regulation of myeloid leukocyte cytokine production involved in immune response	1	0.538467	0.196812
BP	cellular response to follicle-stimulating hormone stimulus	1	0.538467	0.196812
BP	glomerular visceral epithelial cell development	1	0.538467	0.196812
BP	primitive streak formation	1	0.538467	0.196812
BP	erythrose 4-phosphate/phosphoenolpyruvate family amino acid metabolic process	1	0.538467	0.196812
BP	erythrose 4-phosphate/phosphoenolpyruvate family amino acid catabolic process	1	0.538467	0.196812
BP	regulation of calcium ion transmembrane transport via high voltage-gated calcium channel	1	0.538467	0.196812
BP	positive regulation of transcription from RNA polymerase II promoter in response to endoplasmic reticulum stress	1	0.538467	0.196812
BP	positive regulation of acrosome reaction	1	0.538467	0.196812
BP	regulation of histone H3-K9 acetylation	1	0.538467	0.196812
BP	negative regulation of neuron migration	1	0.538467	0.196812
BP	JNK cascade	6	0.539958	0.197525
BP	negative regulation of cell-cell adhesion	5	0.542119	0.198861
BP	regulation of plasma membrane bounded cell projection assembly	5	0.542119	0.198861
BP	drug transmembrane transport	3	0.542119	0.199357
BP	granulocyte migration	4	0.542119	0.200246
BP	epithelial cell development	6	0.542119	0.200567
BP	regulation of nucleotide metabolic process	6	0.542119	0.200567
BP	unsaturated fatty acid biosynthetic process	2	0.542119	0.200693
BP	organic cation transport	2	0.542119	0.200693
BP	activin receptor signaling pathway	2	0.542119	0.200693
BP	regulation of filopodium assembly	2	0.542119	0.200693
BP	regulation of actin filament-based movement	2	0.542119	0.200693
BP	monocarboxylic acid transport	5	0.542119	0.202317
BP	cell-cell adhesion via plasma-membrane adhesion molecules	7	0.542119	0.202445
BP	determination of left/right symmetry	4	0.542119	0.204315
BP	muscle tissue morphogenesis	3	0.542119	0.204433
BP	response to fatty acid	3	0.542119	0.204433
BP	regulation of cell projection assembly	5	0.542119	0.205794
BP	eye photoreceptor cell differentiation	2	0.542119	0.207918
BP	striated muscle cell apoptotic process	2	0.542119	0.207918
BP	apoptotic cell clearance	2	0.542119	0.207918
BP	autonomic nervous system development	2	0.542119	0.207918
BP	regulation of meiotic cell cycle	2	0.542119	0.207918
BP	regulation of muscle contraction	5	0.542119	0.209291
BP	regulation of epidermis development	3	0.542119	0.209537
BP	insulin secretion	6	0.542119	0.209794
BP	regulation of cell morphogenesis	12	0.542119	0.21146
BP	organic acid transmembrane transport	4	0.542119	0.212525
BP	carboxylic acid transmembrane transport	4	0.542119	0.212525
BP	urea cycle	1	0.542119	0.212662
BP	regulation of angiotensin levels in blood	1	0.542119	0.212662
BP	angiotensin maturation	1	0.542119	0.212662
BP	cardiac chamber formation	1	0.542119	0.212662
BP	sphingosine-1-phosphate signaling pathway	1	0.542119	0.212662
BP	disaccharide metabolic process	1	0.542119	0.212662
BP	ethanol oxidation	1	0.542119	0.212662
BP	mineralocorticoid biosynthetic process	1	0.542119	0.212662
BP	mineralocorticoid metabolic process	1	0.542119	0.212662
BP	post-embryonic animal morphogenesis	1	0.542119	0.212662
BP	negative regulation of heart rate	1	0.542119	0.212662
BP	regulation of plasminogen activation	1	0.542119	0.212662
BP	positive regulation of fibroblast migration	1	0.542119	0.212662
BP	regulation of macrophage cytokine production	1	0.542119	0.212662
BP	neural crest formation	1	0.542119	0.212662
BP	negative regulation of muscle adaptation	1	0.542119	0.212662
BP	skeletal myofibril assembly	1	0.542119	0.212662
BP	C4-dicarboxylate transport	1	0.542119	0.212662
BP	urate transport	1	0.542119	0.212662
BP	olfactory bulb interneuron differentiation	1	0.542119	0.212662
BP	dermatan sulfate biosynthetic process	1	0.542119	0.212662
BP	negative regulation of interleukin-17 production	1	0.542119	0.212662
BP	response to vitamin E	1	0.542119	0.212662
BP	cell-cell adhesion mediated by integrin	1	0.542119	0.212662
BP	positive regulation of heterotypic cell-cell adhesion	1	0.542119	0.212662
BP	regulation of peroxisome proliferator activated receptor signaling pathway	1	0.542119	0.212662
BP	nerve growth factor signaling pathway	1	0.542119	0.212662
BP	chemokine biosynthetic process	1	0.542119	0.212662
BP	negative regulation of vascular permeability	1	0.542119	0.212662
BP	positive regulation of meiotic nuclear division	1	0.542119	0.212662
BP	positive regulation of collateral sprouting	1	0.542119	0.212662
BP	negative regulation of oligodendrocyte differentiation	1	0.542119	0.212662
BP	chemical homeostasis within a tissue	1	0.542119	0.212662
BP	chemokine metabolic process	1	0.542119	0.212662
BP	actin crosslink formation	1	0.542119	0.212662
BP	positive regulation of hair follicle development	1	0.542119	0.212662
BP	branching involved in prostate gland morphogenesis	1	0.542119	0.212662
BP	trophoblast giant cell differentiation	1	0.542119	0.212662
BP	embryonic camera-type eye formation	1	0.542119	0.212662
BP	negative regulation of gene silencing by miRNA	1	0.542119	0.212662
BP	regulation of thymocyte apoptotic process	1	0.542119	0.212662
BP	nephric duct morphogenesis	1	0.542119	0.212662
BP	glomerular epithelial cell development	1	0.542119	0.212662
BP	chemokine (C-X-C motif) ligand 2 production	1	0.542119	0.212662
BP	G-protein coupled receptor signaling pathway involved in heart process	1	0.542119	0.212662
BP	positive regulation of chemokine secretion	1	0.542119	0.212662
BP	sphingolipid mediated signaling pathway	1	0.542119	0.212662
BP	ATP hydrolysis coupled anion transmembrane transport	1	0.542119	0.212662
BP	regulation of cell proliferation involved in kidney development	1	0.542119	0.212662
BP	regulation of high voltage-gated calcium channel activity	1	0.542119	0.212662
BP	ketone body metabolic process	1	0.542119	0.212662
BP	positive regulation of tumor necrosis factor secretion	1	0.542119	0.212662
BP	Wnt signaling pathway involved in midbrain dopaminergic neuron differentiation	1	0.542119	0.212662
BP	positive regulation of fertilization	1	0.542119	0.212662
BP	regulation of cell-cell adhesion mediated by cadherin	1	0.542119	0.212662
BP	positive regulation of cellular senescence	1	0.542119	0.212662
BP	regulation of store-operated calcium entry	1	0.542119	0.212662
BP	negative regulation of neuron differentiation	6	0.542302	0.212903
BP	fat-soluble vitamin metabolic process	2	0.545052	0.21517
BP	negative regulation of stress-activated MAPK cascade	2	0.545052	0.21517
BP	establishment or maintenance of epithelial cell apical/basal polarity	2	0.545052	0.21517
BP	negative regulation of lymphocyte differentiation	2	0.545052	0.21517
BP	cofactor transport	2	0.545052	0.21517
BP	negative regulation of stress-activated protein kinase signaling cascade	2	0.545052	0.21517
BP	response to epidermal growth factor	2	0.545052	0.21517
BP	regulation of epithelial cell migration	7	0.547851	0.216445
BP	pattern specification process	11	0.550323	0.217593
BP	positive regulation of smooth muscle cell proliferation	3	0.555542	0.21983
BP	positive regulation of JNK cascade	4	0.555707	0.220826
BP	positive regulation of interleukin-8 production	2	0.555707	0.222445
BP	icosanoid transport	2	0.555707	0.222445
BP	fatty acid derivative transport	2	0.555707	0.222445
BP	positive regulation of lymphocyte differentiation	3	0.555707	0.225015
BP	regulation of synapse organization	5	0.555707	0.227056
BP	phagolysosome assembly	1	0.555707	0.2282
BP	neurological system process involved in regulation of systemic arterial blood pressure	1	0.555707	0.2282
BP	positive regulation of cellular extravasation	1	0.555707	0.2282
BP	cardiac conduction system development	1	0.555707	0.2282
BP	glycine metabolic process	1	0.555707	0.2282
BP	basic amino acid transport	1	0.555707	0.2282
BP	layer formation in cerebral cortex	1	0.555707	0.2282
BP	dermatan sulfate metabolic process	1	0.555707	0.2282
BP	positive regulation of pseudopodium assembly	1	0.555707	0.2282
BP	regulation of guanylate cyclase activity	1	0.555707	0.2282
BP	positive regulation of hormone metabolic process	1	0.555707	0.2282
BP	regulation of cell projection size	1	0.555707	0.2282
BP	positive regulation of interleukin-5 production	1	0.555707	0.2282
BP	Notch receptor processing, ligand-dependent	1	0.555707	0.2282
BP	interleukin-15-mediated signaling pathway	1	0.555707	0.2282
BP	T-helper 2 cell cytokine production	1	0.555707	0.2282
BP	norepinephrine metabolic process	1	0.555707	0.2282
BP	positive regulation of hair cycle	1	0.555707	0.2282
BP	regulation of cell fate specification	1	0.555707	0.2282
BP	positive regulation of insulin-like growth factor receptor signaling pathway	1	0.555707	0.2282
BP	histone H3-K9 acetylation	1	0.555707	0.2282
BP	positive regulation of macrophage differentiation	1	0.555707	0.2282
BP	cardiac muscle fiber development	1	0.555707	0.2282
BP	white fat cell differentiation	1	0.555707	0.2282
BP	chloride ion homeostasis	1	0.555707	0.2282
BP	lateral sprouting from an epithelium	1	0.555707	0.2282
BP	eyelid development in camera-type eye	1	0.555707	0.2282
BP	calcium ion transmembrane transport via high voltage-gated calcium channel	1	0.555707	0.2282
BP	cellular response to interleukin-15	1	0.555707	0.2282
BP	cellular response to estrogen stimulus	1	0.555707	0.2282
BP	cellular response to cholesterol	1	0.555707	0.2282
BP	striated muscle myosin thick filament assembly	1	0.555707	0.2282
BP	collecting duct development	1	0.555707	0.2282
BP	ureter development	1	0.555707	0.2282
BP	regulation of brown fat cell differentiation	1	0.555707	0.2282
BP	positive regulation of cell aging	1	0.555707	0.2282
BP	replicative senescence	1	0.555707	0.2282
BP	GABAergic neuron differentiation	1	0.555707	0.2282
BP	regulation of relaxation of muscle	1	0.555707	0.2282
BP	regulation of transcription from RNA polymerase II promoter involved in heart development	1	0.555707	0.2282
BP	excitatory synapse assembly	1	0.555707	0.2282
BP	positive regulation of endothelial cell chemotaxis	1	0.555707	0.2282
BP	actin filament organization	10	0.555905	0.228454
BP	negative regulation of myeloid leukocyte differentiation	2	0.557341	0.229738
BP	purine nucleotide catabolic process	2	0.557341	0.229738
BP	regulation of chondrocyte differentiation	2	0.557341	0.229738
BP	regulation of telomerase activity	2	0.557341	0.229738
BP	regulation of lipase activity	3	0.558096	0.230223
BP	positive regulation of neurogenesis	11	0.558196	0.230638
BP	positive regulation of small molecule metabolic process	5	0.558196	0.230661
BP	negative regulation of protein kinase activity	7	0.558196	0.230786
BP	positive regulation of T cell activation	6	0.560421	0.231881
BP	response to estradiol	4	0.563751	0.233433
BP	regulation of MAP kinase activity	9	0.5665	0.23511
BP	muscle cell migration	3	0.5665	0.235454
BP	C-terminal protein amino acid modification	3	0.5665	0.235454
BP	regulation of axon extension	3	0.5665	0.235454
BP	muscle organ morphogenesis	3	0.5665	0.235454
BP	establishment or maintenance of apical/basal cell polarity	2	0.56742	0.237048
BP	establishment or maintenance of bipolar cell polarity	2	0.56742	0.237048
BP	L-alpha-amino acid transmembrane transport	2	0.56742	0.237048
BP	positive regulation of hormone secretion	4	0.56742	0.237675
BP	positive regulation of hemopoiesis	5	0.56742	0.241576
BP	positive regulation of T cell cytokine production	1	0.56742	0.243432
BP	regulation of cytokine secretion involved in immune response	1	0.56742	0.243432
BP	negative regulation of type 2 immune response	1	0.56742	0.243432
BP	heart valve formation	1	0.56742	0.243432
BP	cardiac left ventricle morphogenesis	1	0.56742	0.243432
BP	regulation of cilium movement	1	0.56742	0.243432
BP	complement activation, alternative pathway	1	0.56742	0.243432
BP	mesodermal cell fate specification	1	0.56742	0.243432
BP	adult heart development	1	0.56742	0.243432
BP	oligosaccharide catabolic process	1	0.56742	0.243432
BP	negative regulation of keratinocyte proliferation	1	0.56742	0.243432
BP	macrophage cytokine production	1	0.56742	0.243432
BP	terpenoid biosynthetic process	1	0.56742	0.243432
BP	urea metabolic process	1	0.56742	0.243432
BP	hemoglobin metabolic process	1	0.56742	0.243432
BP	chondroitin sulfate catabolic process	1	0.56742	0.243432
BP	myosin filament assembly	1	0.56742	0.243432
BP	regulation of pseudopodium assembly	1	0.56742	0.243432
BP	negative regulation of response to extracellular stimulus	1	0.56742	0.243432
BP	negative regulation of response to nutrient levels	1	0.56742	0.243432
BP	negative regulation of nitric oxide biosynthetic process	1	0.56742	0.243432
BP	T-helper 2 cell differentiation	1	0.56742	0.243432
BP	amino sugar catabolic process	1	0.56742	0.243432
BP	negative regulation of bone remodeling	1	0.56742	0.243432
BP	forebrain morphogenesis	1	0.56742	0.243432
BP	positive regulation of nitric-oxide synthase biosynthetic process	1	0.56742	0.243432
BP	regulation of protein glycosylation	1	0.56742	0.243432
BP	proton-transporting two-sector ATPase complex assembly	1	0.56742	0.243432
BP	positive regulation of T cell apoptotic process	1	0.56742	0.243432
BP	response to interleukin-15	1	0.56742	0.243432
BP	positive regulation of metanephros development	1	0.56742	0.243432
BP	bundle of His cell to Purkinje myocyte communication	1	0.56742	0.243432
BP	regulation of chemokine secretion	1	0.56742	0.243432
BP	iron ion import	1	0.56742	0.243432
BP	positive regulation of ruffle assembly	1	0.56742	0.243432
BP	regulation of defense response to bacterium	1	0.56742	0.243432
BP	negative regulation of nitric oxide metabolic process	1	0.56742	0.243432
BP	regulation of vasculogenesis	1	0.56742	0.243432
BP	mesenchymal cell proliferation	2	0.567544	0.244369
BP	negative regulation of smooth muscle cell proliferation	2	0.567544	0.244369
BP	positive regulation of stress fiber assembly	2	0.567544	0.244369
BP	face development	2	0.567544	0.244369
BP	T cell apoptotic process	2	0.567544	0.244369
BP	regulation of stress-activated MAPK cascade	6	0.568179	0.244819
BP	striated muscle contraction	5	0.568756	0.245245
BP	dicarboxylic acid transport	3	0.568792	0.245976
BP	cardiac muscle tissue growth	3	0.568792	0.245976
BP	regulation of cardiac muscle tissue development	3	0.568792	0.245976
BP	platelet degranulation	4	0.568792	0.246211
BP	regulation of wound healing	4	0.568792	0.246211
BP	regulation of stress-activated protein kinase signaling cascade	6	0.568792	0.248087
BP	negative regulation of cell activation	5	0.568792	0.248929
BP	cardiac muscle contraction	4	0.568792	0.250505
BP	regulation of actin filament bundle assembly	3	0.568792	0.251265
BP	regulation of synapse assembly	3	0.568792	0.251265
BP	regulation of systemic arterial blood pressure mediated by a chemical signal	2	0.568792	0.251699
BP	regulation of actin filament depolymerization	2	0.568792	0.251699
BP	prostate gland development	2	0.568792	0.251699
BP	ruffle organization	2	0.568792	0.251699
BP	negative regulation of lipid biosynthetic process	2	0.568792	0.251699
BP	regulation of substrate adhesion-dependent cell spreading	2	0.568792	0.251699
BP	regulation of insulin secretion	5	0.568792	0.252627
BP	positive regulation of cytoskeleton organization	6	0.568792	0.25466
BP	nicotinamide nucleotide biosynthetic process	4	0.568792	0.254814
BP	pyridine nucleotide biosynthetic process	4	0.568792	0.254814
BP	post-translational protein modification	11	0.568792	0.255312
BP	regulation of anatomical structure size	12	0.568792	0.255503
BP	response to heat	5	0.568792	0.256339
BP	regulation of striated muscle contraction	3	0.568792	0.25657
BP	fatty acid transport	3	0.568792	0.25657
BP	negative regulation of cysteine-type endopeptidase activity involved in apoptotic process	3	0.568792	0.25657
BP	regulation of hormone secretion	7	0.568792	0.257365
BP	positive regulation of T-helper 1 type immune response	1	0.568792	0.258365
BP	positive regulation of type 2 immune response	1	0.568792	0.258365
BP	morphogenesis of an endothelium	1	0.568792	0.258365
BP	growth plate cartilage development	1	0.568792	0.258365
BP	fructose metabolic process	1	0.568792	0.258365
BP	tripartite regional subdivision	1	0.568792	0.258365
BP	anterior/posterior axis specification, embryo	1	0.568792	0.258365
BP	regulation of cardiac muscle adaptation	1	0.568792	0.258365
BP	regulation of skeletal muscle adaptation	1	0.568792	0.258365
BP	cell wall macromolecule catabolic process	1	0.568792	0.258365
BP	protein-chromophore linkage	1	0.568792	0.258365
BP	myosin filament organization	1	0.568792	0.258365
BP	gonadotropin secretion	1	0.568792	0.258365
BP	positive regulation of interleukin-13 production	1	0.568792	0.258365
BP	primary alcohol catabolic process	1	0.568792	0.258365
BP	chondrocyte proliferation	1	0.568792	0.258365
BP	cell migration involved in gastrulation	1	0.568792	0.258365
BP	positive regulation of glycogen biosynthetic process	1	0.568792	0.258365
BP	aldehyde biosynthetic process	1	0.568792	0.258365
BP	sphingoid metabolic process	1	0.568792	0.258365
BP	positive regulation of insulin receptor signaling pathway	1	0.568792	0.258365
BP	post-embryonic animal organ development	1	0.568792	0.258365
BP	dermatan sulfate proteoglycan biosynthetic process	1	0.568792	0.258365
BP	detection of temperature stimulus involved in sensory perception	1	0.568792	0.258365
BP	detection of temperature stimulus involved in sensory perception of pain	1	0.568792	0.258365
BP	inhibitory postsynaptic potential	1	0.568792	0.258365
BP	negative regulation of posttranscriptional gene silencing	1	0.568792	0.258365
BP	ectodermal placode formation	1	0.568792	0.258365
BP	negative regulation of gene silencing by RNA	1	0.568792	0.258365
BP	endothelial tube morphogenesis	1	0.568792	0.258365
BP	hepatocyte differentiation	1	0.568792	0.258365
BP	negative regulation of neuron projection regeneration	1	0.568792	0.258365
BP	otic vesicle development	1	0.568792	0.258365
BP	ectodermal placode morphogenesis	1	0.568792	0.258365
BP	mitotic cell cycle arrest	1	0.568792	0.258365
BP	nitrogen cycle metabolic process	1	0.568792	0.258365
BP	metanephric mesenchyme development	1	0.568792	0.258365
BP	nephric duct development	1	0.568792	0.258365
BP	regulation of protein kinase C signaling	1	0.568792	0.258365
BP	postsynaptic density organization	1	0.568792	0.258365
BP	postsynaptic specialization organization	1	0.568792	0.258365
BP	regulation of cardiac muscle hypertrophy in response to stress	1	0.568792	0.258365
BP	positive regulation of blood vessel endothelial cell proliferation involved in sprouting angiogenesis	1	0.568792	0.258365
BP	regulation of fibroblast apoptotic process	1	0.568792	0.258365
BP	positive regulation of interleukin-8 secretion	1	0.568792	0.258365
BP	regulation of corticosteroid hormone secretion	1	0.568792	0.258365
BP	positive regulation of neuron migration	1	0.568792	0.258365
BP	receptor clustering	2	0.569326	0.259034
BP	cardiac muscle cell action potential involved in contraction	2	0.569326	0.259034
BP	response to organophosphorus	4	0.569326	0.259139
BP	negative regulation of hydrolase activity	11	0.570597	0.259895
BP	neuron apoptotic process	6	0.572854	0.26128
BP	positive regulation of leukocyte cell-cell adhesion	6	0.572854	0.26128
BP	retinoid metabolic process	3	0.573411	0.261891
BP	activation of GTPase activity	3	0.573411	0.261891
BP	regulation of Rho protein signal transduction	4	0.5761	0.263478
BP	positive regulation of leukocyte differentiation	4	0.5761	0.263478
BP	T-helper cell differentiation	2	0.579537	0.266373
BP	cellular extravasation	2	0.579537	0.266373
BP	platelet-derived growth factor receptor signaling pathway	2	0.579537	0.266373
BP	regulation of cardiac muscle cell proliferation	2	0.579537	0.266373
BP	dendritic spine morphogenesis	2	0.579537	0.266373
BP	bicellular tight junction assembly	2	0.579537	0.266373
BP	regulation of interferon-gamma production	3	0.579537	0.267226
BP	regulation of synapse structure or activity	5	0.579537	0.267551
BP	pyridine-containing compound biosynthetic process	4	0.579537	0.267831
BP	ameboidal-type cell migration	10	0.579537	0.27157
BP	positive regulation of MAP kinase activity	7	0.579537	0.272505
BP	protein N-linked glycosylation	3	0.579537	0.272573
BP	nephron tubule development	3	0.579537	0.272573
BP	positive regulation of peptide hormone secretion	3	0.579537	0.272573
BP	endodermal cell fate commitment	1	0.579537	0.273003
BP	renal system process involved in regulation of blood volume	1	0.579537	0.273003
BP	N-acetylglucosamine metabolic process	1	0.579537	0.273003
BP	UDP-N-acetylglucosamine metabolic process	1	0.579537	0.273003
BP	thyroid hormone generation	1	0.579537	0.273003
BP	glutathione biosynthetic process	1	0.579537	0.273003
BP	prostaglandin transport	1	0.579537	0.273003
BP	microvillus assembly	1	0.579537	0.273003
BP	pseudopodium assembly	1	0.579537	0.273003
BP	positive regulation of CREB transcription factor activity	1	0.579537	0.273003
BP	iron ion transmembrane transport	1	0.579537	0.273003
BP	corticosteroid hormone secretion	1	0.579537	0.273003
BP	protein O-linked fucosylation	1	0.579537	0.273003
BP	regulation of interferon-gamma biosynthetic process	1	0.579537	0.273003
BP	lymph node development	1	0.579537	0.273003
BP	dermatan sulfate proteoglycan metabolic process	1	0.579537	0.273003
BP	atrial septum morphogenesis	1	0.579537	0.273003
BP	coronary vasculature morphogenesis	1	0.579537	0.273003
BP	heterochromatin organization	1	0.579537	0.273003
BP	positive regulation of glycogen metabolic process	1	0.579537	0.273003
BP	regulation of phospholipid biosynthetic process	1	0.579537	0.273003
BP	ectodermal placode development	1	0.579537	0.273003
BP	chemokine secretion	1	0.579537	0.273003
BP	neuron projection arborization	1	0.579537	0.273003
BP	positive regulation of lymphocyte chemotaxis	1	0.579537	0.273003
BP	positive regulation of fatty acid transport	1	0.579537	0.273003
BP	positive regulation of endothelial cell apoptotic process	1	0.579537	0.273003
BP	negative regulation of anoikis	1	0.579537	0.273003
BP	negative regulation of cytokine-mediated signaling pathway	2	0.579537	0.27371
BP	striated muscle adaptation	2	0.579537	0.27371
BP	actin filament depolymerization	2	0.579537	0.27371
BP	positive regulation of mitotic nuclear division	2	0.579537	0.27371
BP	regulation of alpha-beta T cell differentiation	2	0.579537	0.27371
BP	positive regulation of phagocytosis	2	0.579537	0.27371
BP	stem cell differentiation	7	0.586237	0.278626
BP	regulation of metal ion transport	9	0.586237	0.278866
BP	CD4-positive, alpha-beta T cell differentiation involved in immune response	2	0.586237	0.281045
BP	catecholamine metabolic process	2	0.586237	0.281045
BP	catechol-containing compound metabolic process	2	0.586237	0.281045
BP	arachidonic acid metabolic process	2	0.586237	0.281045
BP	positive regulation of chemokine production	2	0.586237	0.281045
BP	regulation of histone acetylation	2	0.586237	0.281045
BP	negative regulation of striated muscle tissue development	2	0.586237	0.281045
BP	regulation of insulin secretion involved in cellular response to glucose stimulus	2	0.586237	0.281045
BP	purine-containing compound catabolic process	2	0.586237	0.281045
BP	regulation of actin polymerization or depolymerization	5	0.586237	0.282666
BP	positive regulation of peptidase activity	5	0.586237	0.282666
BP	midbrain development	3	0.586237	0.283301
BP	heart growth	3	0.586237	0.283301
BP	renal tubule development	3	0.586237	0.283301
BP	vitamin metabolic process	4	0.586237	0.285364
BP	mammary gland development	4	0.586237	0.285364
BP	regulation of actin filament length	5	0.586237	0.286471
BP	sulfur compound metabolic process	9	0.586237	0.286826
BP	osteoblast development	1	0.586237	0.287354
BP	store-operated calcium entry	1	0.586237	0.287354
BP	cytokine secretion involved in immune response	1	0.586237	0.287354
BP	regulation of gene expression by genetic imprinting	1	0.586237	0.287354
BP	Notch receptor processing	1	0.586237	0.287354
BP	dorsal/ventral axis specification	1	0.586237	0.287354
BP	striatum development	1	0.586237	0.287354
BP	pseudopodium organization	1	0.586237	0.287354
BP	response to follicle-stimulating hormone	1	0.586237	0.287354
BP	wound healing, spreading of epidermal cells	1	0.586237	0.287354
BP	cellular response to sterol	1	0.586237	0.287354
BP	nodal signaling pathway	1	0.586237	0.287354
BP	interferon-gamma biosynthetic process	1	0.586237	0.287354
BP	muscle cell fate commitment	1	0.586237	0.287354
BP	negative regulation of cAMP-mediated signaling	1	0.586237	0.287354
BP	cell wall macromolecule metabolic process	1	0.586237	0.287354
BP	T-helper 1 cell differentiation	1	0.586237	0.287354
BP	negative regulation of epidermis development	1	0.586237	0.287354
BP	regulation of immunoglobulin secretion	1	0.586237	0.287354
BP	positive regulation of meiotic cell cycle	1	0.586237	0.287354
BP	relaxation of cardiac muscle	1	0.586237	0.287354
BP	detoxification of inorganic compound	1	0.586237	0.287354
BP	thymocyte apoptotic process	1	0.586237	0.287354
BP	cellular response to prostaglandin E stimulus	1	0.586237	0.287354
BP	cell wall organization or biogenesis	1	0.586237	0.287354
BP	positive regulation of transforming growth factor beta production	1	0.586237	0.287354
BP	interferon-gamma secretion	1	0.586237	0.287354
BP	negative regulation of kidney development	1	0.586237	0.287354
BP	positive regulation of calcium ion import	1	0.586237	0.287354
BP	postsynapse assembly	1	0.586237	0.287354
BP	extracellular regulation of signal transduction	1	0.586237	0.287354
BP	extracellular negative regulation of signal transduction	1	0.586237	0.287354
BP	positive regulation of long-term synaptic potentiation	1	0.586237	0.287354
BP	positive regulation of extrinsic apoptotic signaling pathway via death domain receptors	1	0.586237	0.287354
BP	positive regulation of telomere capping	1	0.586237	0.287354
BP	regulation of leukocyte adhesion to vascular endothelial cell	1	0.586237	0.287354
BP	endothelial cell development	2	0.586237	0.288373
BP	morphogenesis of an epithelial sheet	2	0.586237	0.288373
BP	alpha-beta T cell activation involved in immune response	2	0.586237	0.288373
BP	alpha-beta T cell differentiation involved in immune response	2	0.586237	0.288373
BP	pigment biosynthetic process	2	0.586237	0.288373
BP	negative regulation of muscle organ development	2	0.586237	0.288373
BP	negative regulation of muscle cell differentiation	2	0.586237	0.288373
BP	regulation of cytokine biosynthetic process	3	0.586488	0.288679
BP	negative regulation of neuron apoptotic process	4	0.588342	0.289775
BP	negative regulation of kinase activity	7	0.590399	0.290972
BP	glycoprotein metabolic process	10	0.591105	0.291504
BP	chondrocyte differentiation	3	0.595546	0.294065
BP	regulation of Notch signaling pathway	3	0.595546	0.294065
BP	response to gamma radiation	2	0.595795	0.295693
BP	positive regulation of DNA binding	2	0.595795	0.295693
BP	regulation of lymphocyte apoptotic process	2	0.595795	0.295693
BP	cell communication involved in cardiac conduction	2	0.595795	0.295693
BP	negative regulation of muscle tissue development	2	0.595795	0.295693
BP	negative regulation of reproductive process	2	0.595795	0.295693
BP	cardiocyte differentiation	4	0.595795	0.298623
BP	ureteric bud development	3	0.595795	0.299457
BP	lymphoid progenitor cell differentiation	1	0.595795	0.301422
BP	cellular sodium ion homeostasis	1	0.595795	0.301422
BP	activation of NF-kappaB-inducing kinase activity	1	0.595795	0.301422
BP	blastoderm segmentation	1	0.595795	0.301422
BP	cardioblast differentiation	1	0.595795	0.301422
BP	negative regulation of platelet activation	1	0.595795	0.301422
BP	glycoside metabolic process	1	0.595795	0.301422
BP	nonribosomal peptide biosynthetic process	1	0.595795	0.301422
BP	maintenance of gastrointestinal epithelium	1	0.595795	0.301422
BP	notochord development	1	0.595795	0.301422
BP	positive regulation of phosphoprotein phosphatase activity	1	0.595795	0.301422
BP	negative regulation of chemokine production	1	0.595795	0.301422
BP	regulation of mammary gland epithelial cell proliferation	1	0.595795	0.301422
BP	CD4-positive, alpha-beta T cell cytokine production	1	0.595795	0.301422
BP	myeloid dendritic cell differentiation	1	0.595795	0.301422
BP	type B pancreatic cell proliferation	1	0.595795	0.301422
BP	fibroblast apoptotic process	1	0.595795	0.301422
BP	positive regulation of T-helper cell differentiation	1	0.595795	0.301422
BP	paraxial mesoderm development	1	0.595795	0.301422
BP	negative regulation of T cell receptor signaling pathway	1	0.595795	0.301422
BP	nitric-oxide synthase biosynthetic process	1	0.595795	0.301422
BP	regulation of nitric-oxide synthase biosynthetic process	1	0.595795	0.301422
BP	positive regulation of lymphocyte apoptotic process	1	0.595795	0.301422
BP	cellular response to gonadotropin stimulus	1	0.595795	0.301422
BP	cellular response to low-density lipoprotein particle stimulus	1	0.595795	0.301422
BP	positive regulation of myoblast fusion	1	0.595795	0.301422
BP	positive regulation of extracellular matrix organization	1	0.595795	0.301422
BP	negative regulation of blood vessel endothelial cell proliferation involved in sprouting angiogenesis	1	0.595795	0.301422
BP	positive regulation of actin cytoskeleton reorganization	1	0.595795	0.301422
BP	regulation of NMDA receptor activity	1	0.595795	0.301422
BP	regulation of steroid hormone secretion	1	0.595795	0.301422
BP	morphogenesis of a branching epithelium	5	0.596139	0.301781
BP	production of molecular mediator involved in inflammatory response	2	0.597815	0.303002
BP	negative regulation of response to cytokine stimulus	2	0.597815	0.303002
BP	response to xenobiotic stimulus	7	0.598313	0.303441
BP	mesonephric epithelium development	3	0.599995	0.304854
BP	mesonephric tubule development	3	0.599995	0.304854
BP	reactive oxygen species biosynthetic process	3	0.599995	0.304854
BP	female pregnancy	5	0.600784	0.305629
BP	sulfur compound biosynthetic process	5	0.600784	0.305629
BP	actin filament bundle assembly	4	0.6041	0.307504
BP	cellular modified amino acid metabolic process	5	0.605541	0.309485
BP	cellular response to alcohol	2	0.605541	0.310297
BP	positive regulation of cation channel activity	2	0.605541	0.310297
BP	mesodermal cell fate commitment	1	0.605541	0.315213
BP	desensitization of G-protein coupled receptor protein signaling pathway	1	0.605541	0.315213
BP	chronic inflammatory response	1	0.605541	0.315213
BP	type B pancreatic cell development	1	0.605541	0.315213
BP	N-glycan processing	1	0.605541	0.315213
BP	water transport	1	0.605541	0.315213
BP	asymmetric cell division	1	0.605541	0.315213
BP	regulation of cardiac muscle contraction by regulation of the release of sequestered calcium ion	1	0.605541	0.315213
BP	detection of temperature stimulus	1	0.605541	0.315213
BP	negative adaptation of signaling pathway	1	0.605541	0.315213
BP	intracellular sterol transport	1	0.605541	0.315213
BP	intracellular cholesterol transport	1	0.605541	0.315213
BP	negative regulation of interleukin-2 production	1	0.605541	0.315213
BP	negative regulation of tissue remodeling	1	0.605541	0.315213
BP	middle ear morphogenesis	1	0.605541	0.315213
BP	mRNA transcription by RNA polymerase II	1	0.605541	0.315213
BP	thymic T cell selection	1	0.605541	0.315213
BP	regulation of circadian sleep/wake cycle, sleep	1	0.605541	0.315213
BP	negative regulation of nucleocytoplasmic transport	1	0.605541	0.315213
BP	embryonic digestive tract morphogenesis	1	0.605541	0.315213
BP	negative regulation of cardiac muscle cell proliferation	1	0.605541	0.315213
BP	negative regulation of biomineral tissue development	1	0.605541	0.315213
BP	negative regulation of T cell apoptotic process	1	0.605541	0.315213
BP	histone H3-K27 methylation	1	0.605541	0.315213
BP	vocalization behavior	1	0.605541	0.315213
BP	response to nitric oxide	1	0.605541	0.315213
BP	kidney mesenchyme development	1	0.605541	0.315213
BP	nephron tubule formation	1	0.605541	0.315213
BP	amino acid import across plasma membrane	1	0.605541	0.315213
BP	presynapse assembly	1	0.605541	0.315213
BP	negative regulation of endoplasmic reticulum stress-induced intrinsic apoptotic signaling pathway	1	0.605541	0.315213
BP	positive regulation of dendrite extension	1	0.605541	0.315213
BP	regulation of myoblast proliferation	1	0.605541	0.315213
BP	regulation of mesoderm development	1	0.605541	0.315213
BP	regulation of DNA biosynthetic process	3	0.606037	0.31566
BP	filopodium assembly	2	0.608263	0.317577
BP	negative regulation of cytokine secretion	2	0.608263	0.317577
BP	regulation of postsynapse organization	2	0.608263	0.317577
BP	regulation of peptidyl-lysine acetylation	2	0.608263	0.317577
BP	actin filament bundle organization	4	0.614212	0.320874
BP	regulation of organ growth	3	0.614214	0.321066
BP	phospholipid metabolic process	11	0.618074	0.324181
BP	negative regulation of intracellular transport	2	0.618074	0.324838
BP	maternal process involved in female pregnancy	2	0.618074	0.324838
BP	interferon-gamma production	3	0.618074	0.326473
BP	positive regulation of transmembrane receptor protein serine/threonine kinase signaling pathway	3	0.618074	0.326473
BP	postsynapse organization	3	0.618074	0.326473
BP	regulation of supramolecular fiber organization	8	0.618074	0.326965
BP	regulation of peptidase activity	10	0.618074	0.327277
BP	cardiac right ventricle morphogenesis	1	0.618074	0.328733
BP	atrial septum development	1	0.618074	0.328733
BP	epithelial cilium movement	1	0.618074	0.328733
BP	arginine metabolic process	1	0.618074	0.328733
BP	vascular smooth muscle contraction	1	0.618074	0.328733
BP	leukotriene biosynthetic process	1	0.618074	0.328733
BP	peroxisome proliferator activated receptor signaling pathway	1	0.618074	0.328733
BP	response to interferon-alpha	1	0.618074	0.328733
BP	calcium-mediated signaling using intracellular calcium source	1	0.618074	0.328733
BP	thyroid hormone metabolic process	1	0.618074	0.328733
BP	positive regulation of myoblast differentiation	1	0.618074	0.328733
BP	immunoglobulin secretion	1	0.618074	0.328733
BP	negative regulation of axon extension involved in axon guidance	1	0.618074	0.328733
BP	pericardium development	1	0.618074	0.328733
BP	regulation of acrosome reaction	1	0.618074	0.328733
BP	mesenchymal to epithelial transition	1	0.618074	0.328733
BP	branch elongation of an epithelium	1	0.618074	0.328733
BP	negative regulation of oxidative stress-induced intrinsic apoptotic signaling pathway	1	0.618074	0.328733
BP	negative regulation of vascular smooth muscle cell proliferation	1	0.618074	0.328733
BP	negative regulation of neural precursor cell proliferation	1	0.618074	0.328733
BP	negative regulation of CD4-positive, alpha-beta T cell activation	1	0.618074	0.328733
BP	regulation of purine nucleotide metabolic process	5	0.618074	0.328857
BP	activation of MAPK activity	4	0.619144	0.329812
BP	response to purine-containing compound	4	0.619144	0.329812
BP	intrinsic apoptotic signaling pathway in response to DNA damage	3	0.62014	0.33188
BP	T cell differentiation involved in immune response	2	0.62014	0.33208
BP	iron ion transport	2	0.62014	0.33208
BP	proteoglycan biosynthetic process	2	0.62014	0.33208
BP	insulin secretion involved in cellular response to glucose stimulus	2	0.62014	0.33208
BP	mechanoreceptor differentiation	2	0.62014	0.33208
BP	apical junction assembly	2	0.62014	0.33208
BP	cellular response to calcium ion	2	0.62014	0.33208
BP	regulation of stem cell proliferation	2	0.62014	0.33208
BP	regionalization	8	0.62626	0.3358
BP	regulation of neuron apoptotic process	5	0.62626	0.336642
BP	positive regulation of supramolecular fiber organization	5	0.62626	0.336642
BP	regulation of striated muscle cell differentiation	3	0.62626	0.337285
BP	aging	7	0.62626	0.33824
BP	positive regulation of stress-activated MAPK cascade	4	0.62626	0.338763
BP	cardiac muscle cell proliferation	2	0.62626	0.339299
BP	drug transport	5	0.62626	0.34054
BP	acute inflammatory response to antigenic stimulus	1	0.62626	0.341986
BP	atrioventricular valve morphogenesis	1	0.62626	0.341986
BP	ethanol metabolic process	1	0.62626	0.341986
BP	synaptonemal complex assembly	1	0.62626	0.341986
BP	aromatic amino acid family catabolic process	1	0.62626	0.341986
BP	negative regulation of tumor necrosis factor-mediated signaling pathway	1	0.62626	0.341986
[truncated: 1,946 more rows]
